# Supplementary material for: Identification of chemical components and rat serum metabolites in Danggui Buxue decoction based on UPLC-Q-TOF-MS, the UNIFI platform and molecular networks
Source: PubMed Central journal article supplement — RSC Adv. 2023 Nov 7;13(46):32778–85. doi: 10.1039/d3ra04419j (PMC10628667; doi:10.1039/d3ra04419j), 2023-11-07
Supplement: RA-013-D3RA04419J-s001.pdf [file RA-013-D3RA04419J-s001.pdf]

## Supplementary Materials

### Identification of chemical components and serum metabolites in Danggui Buxue Decoction based on UPLC-Q-TOF-MS, UNIFI platform and molecular network

Yanhui Lv<sup>ab‡</sup>, Xike Xu<sup>a‡</sup>, Jishun Yang<sup>c‡</sup>, Yuan Gao<sup>ab</sup>, Jiayun Xin<sup>ab</sup>, Wei Chen<sup>a</sup>, Li Zhang<sup>b</sup>, Jiali Li<sup>b</sup>, Jie Wang<sup>b</sup>, Yanping Wei<sup>b</sup>, Xintong Wei<sup>b</sup>, Jixiang He<sup>\*b</sup>, Xianpeng Zu<sup>\*a</sup>,

<sup>a</sup> Department of Natural Medicinal Chemistry, School of Pharmacy, Naval Medical University, Shanghai, 200433, China

<sup>b</sup> Department of Pharmaceutical Analysis, School of Pharmacy, Shandong University of Traditional Chinese Medicine, Jinan, 250355, China

<sup>c</sup> Medical Security Center, Naval Medical Center, Naval Medical University, Shanghai 200433, China

<sup>‡</sup> These authors contributed equally to this work.

#### \* Correspondence

Address: Department of Natural Medicinal Chemistry, School of Pharmacy, Naval Medical University, No. 325 Guohe Road, Yangpu District, Shanghai 200433, China.

Corresponding Authors: Dr. Jixiang He, E-mail: 05000044@sdutcm.edu.cn; Dr. Xianpeng Zu, E-mail: zuxianpeng@163.com

## **Supplementary Figure Legends**

**Figure S1.** Molecular networks from DBD in positive (A) and negative (B) ion modes.

## **Supplementary Tables**

**Table S1.** Identification of the chemical components in DBD by UPLC-Q-TOF-MS

**Table S2.** Prototype components of DBD in rat serum by UPLC-Q-TOF-MS

**Table S3.** Identification of the exogenous metabolites of DBD by UPLC-Q-TOF-MS

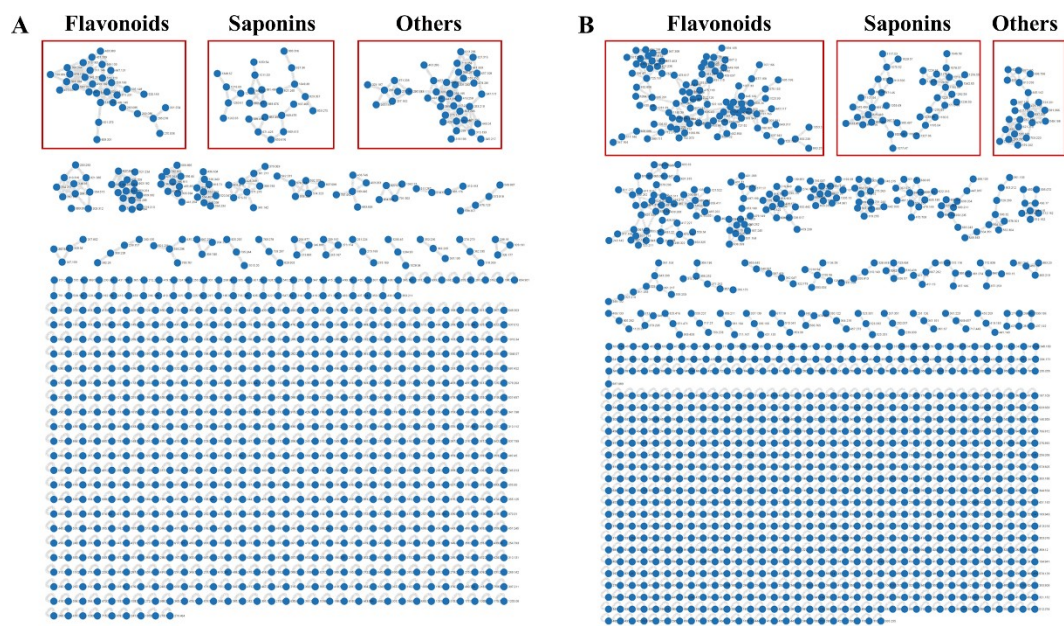

**Figure S1.** Molecular networks from DBD in positive (A) and negative (B) ion modes.

**Table S1.** Identification of the chemical components in DBD by UPLC-Q-TOF-MS.

| No. | RT (min) | Identification         | Formula                                                        | MS                                                         | Error (ppm) | MS/MS                                    | Classification | Origin |
|-----|----------|------------------------|----------------------------------------------------------------|------------------------------------------------------------|-------------|------------------------------------------|----------------|--------|
| 1   | 0.60     | Raffinose              | C <sub>18</sub> H <sub>32</sub> O <sub>16</sub>                | 543.1346 [M+K] <sup>+</sup>                                | -0.7        | 381.0835, 363.0745                       | Others         | HQ/DG  |
| 2   | 0.65     | Sucrose                | C <sub>12</sub> H <sub>22</sub> O <sub>11</sub>                | 365.1068 [M+Na] <sup>+</sup>                               | 2.1         | 203.0579, 185.0455                       | Others         | HQ/DG  |
| 3   | 0.66     | Cytidine monophosphate | C <sub>9</sub> H <sub>14</sub> N <sub>3</sub> O <sub>8</sub> P | 322.0439 [M-H] <sup>-</sup>                                | -0.3        | 110.0348                                 | Others         | HQ     |
| 4   | 0.78     | Citric acid            | C <sub>6</sub> H <sub>8</sub> O <sub>7</sub>                   | 191.0185 [M-H] <sup>-</sup>                                | –           | 129.0186, 111.0084, 87.0078              | Organic acids  | HQ/DG  |
| 5   | 0.85     | Uridine monophosphate  | C <sub>9</sub> H <sub>13</sub> N <sub>2</sub> O <sub>9</sub> P | 323.0262 [M-H] <sup>-</sup>                                | –           | 111.0195                                 | Others         | HQ     |
| 6   | 0.87     | Guanine                | C <sub>5</sub> H <sub>5</sub> N <sub>5</sub> O                 | 152.0672 [M+H] <sup>+</sup>                                | 0           | 135.0310, 110.0340                       | Others         | HQ/DG  |
| 7   | 1.02     | Malic acid             | C <sub>4</sub> H <sub>6</sub> O <sub>5</sub>                   | 133.0138 [M-H] <sup>-</sup>                                | -3.4        | 115.0128                                 | Organic acids  | HQ/DG  |
| 8   | 1.02     | Tyrosine*              | C <sub>9</sub> H <sub>11</sub> NO <sub>3</sub>                 | 182.0826 [M+H] <sup>+</sup>                                | 4.9         | 136.0779                                 | Amino acids    | HQ/DG  |
| 9   | 1.03     | Adenosine*             | C <sub>10</sub> H <sub>13</sub> N <sub>5</sub> O <sub>4</sub>  | 268.1083 [M+H] <sup>+</sup>                                | 3.7         | 136.0626, 119.0392                       | Others         | HQ/DG  |
| 10  | 1.16     | Guanosine              | C <sub>10</sub> H <sub>13</sub> N <sub>5</sub> O <sub>5</sub>  | 282.0824 [M-H] <sup>-</sup><br>284.0995 [M+H] <sup>+</sup> | -7<br>0     | 150.0413<br>152.0572, 135.0310, 110.0386 | Others         | HQ/DG  |
| 11  | 1.18     | Inosine*               | C <sub>10</sub> H <sub>12</sub> N <sub>4</sub> O <sub>5</sub>  | 267.0715 [M-H] <sup>-</sup>                                | –           | 135.0277                                 | Others         | DG     |
| 12  | 1.19     | Arg-Ile                | C <sub>12</sub> H <sub>25</sub> N <sub>5</sub> O <sub>3</sub>  | 288.2091 [M+H] <sup>+</sup>                                | –           | 271.1797, 175.1234                       | Amino acids    | HQ/DG  |

|           |      |                         |                                                               |                              |      |                                        |               |       |
|-----------|------|-------------------------|---------------------------------------------------------------|------------------------------|------|----------------------------------------|---------------|-------|
| <b>13</b> | 1.19 | Leucine*                | C <sub>6</sub> H <sub>13</sub> NO <sub>2</sub>                | 130.0865 [M+H] <sup>+</sup>  | -2.3 | –                                      | Amino acids   | HQ/DG |
| <b>14</b> | 1.32 | Adenine                 | C <sub>5</sub> H <sub>5</sub> N <sub>5</sub>                  | 136.0626 [M+H] <sup>+</sup>  | 2.2  | 119.0345                               | Others        | HQ/DG |
| <b>15</b> | 1.46 | Xanthosine              | C <sub>10</sub> H <sub>12</sub> N <sub>4</sub> O <sub>6</sub> | 283.0670 [M-H] <sup>-</sup>  | -3.2 | 151.0250                               | Others        | HQ    |
| <b>16</b> | 1.52 | Mycose                  | C <sub>12</sub> H <sub>22</sub> O <sub>11</sub>               | 365.1068 [M+Na] <sup>+</sup> | 2.1  | 203.0516, 185.0455                     | Others        | HQ/DG |
| <b>17</b> | 1.88 | Phenylalanine           | C <sub>9</sub> H <sub>11</sub> NO <sub>2</sub>                | 166.0852 [M+H] <sup>+</sup>  | 2.4  | 120.0821, 103.0556                     | Amino acids   | HQ/DG |
| <b>18</b> | 1.98 | Canavanine              | C <sub>5</sub> H <sub>12</sub> N <sub>4</sub> O <sub>3</sub>  | 177.0977 [M+H] <sup>+</sup>  | -3.1 | 160.0727, 118.0507                     | Amino acids   | HQ    |
| <b>19</b> | 2.04 | Pyrocatechuic acid      | C <sub>7</sub> H <sub>6</sub> O <sub>4</sub>                  | 153.0185 [M-H] <sup>-</sup>  | -1.9 | 109.0275                               | Organic acids | HQ    |
| <b>20</b> | 2.18 | Arginine                | C <sub>6</sub> H <sub>14</sub> N <sub>4</sub> O <sub>2</sub>  | 175.1183 [M+H] <sup>+</sup>  | -3.9 | 158.0905, 130.0961, 116.0718           | Amino acids   | HQ/DG |
| <b>21</b> | 2.20 | Pantothenate            | C <sub>9</sub> H <sub>17</sub> NO <sub>5</sub>                | 218.1016 [M-H] <sup>-</sup>  | -5   | 146.0810                               | Organic acids | HQ/DG |
| <b>22</b> | 2.38 | 4-Hydroxybenzoic acid   | C <sub>7</sub> H <sub>6</sub> O <sub>3</sub>                  | 137.0235 [M-H] <sup>-</sup>  | –    | 93.0338                                | Organic acids | HQ    |
| <b>23</b> | 2.40 | Piscidic acid           | C <sub>11</sub> H <sub>12</sub> O <sub>7</sub>                | 255.0492 [M-H] <sup>-</sup>  | -5   | 193.0495, 165.0548                     | Organic acids | HQ    |
| <b>24</b> | 2.42 | Succinoadenosine        | C <sub>14</sub> H <sub>17</sub> N <sub>5</sub> O <sub>8</sub> | 384.1151 [M+H] <sup>+</sup>  | -1   | 252.0724, 234.0624, 188.0559, 162.0772 | Amino acids   | HQ/DG |
| <b>25</b> | 3.22 | Chlorogenic acid isomer | C <sub>16</sub> H <sub>18</sub> O <sub>9</sub>                | 353.0886 [M-H] <sup>-</sup>  | 2.3  | 191.0552, 179.0359, 135.0467           | Organic acids | HQ/DG |
| <b>26</b> | 3.34 | Indole-3-carboxaldehyde | C <sub>9</sub> H <sub>7</sub> NO                              | 146.0600 [M+H] <sup>+</sup>  | -4.1 | 118.0676, 91.0546                      | Others        | HQ/DG |

|    |      |                              |                                                               |                                                                |             |                                                                        |               |       |
|----|------|------------------------------|---------------------------------------------------------------|----------------------------------------------------------------|-------------|------------------------------------------------------------------------|---------------|-------|
| 27 | 3.35 | Tryptophan*                  | C <sub>11</sub> H <sub>12</sub> N <sub>2</sub> O <sub>2</sub> | 205.0961 [M+H] <sup>+</sup>                                    | -5          | 188.0939, 170.0598, 143.0732, 118.0649                                 | Amino acids   | DG    |
| 28 | 4.50 | Complanatuside               | C <sub>28</sub> H <sub>32</sub> O <sub>16</sub>               | 669.1680 [M+HCOO] <sup>-</sup><br>647.1567 [M+Na] <sup>+</sup> | 1.1<br>-2.5 | 461.1098, 299.0564, 284.0321, 255.0304<br>463.1249, 301.0706           | Flavonoids    | HQ    |
| 29 | 4.50 | Pratensein-7-O-β-D-glucoside | C <sub>22</sub> H <sub>22</sub> O <sub>11</sub>               | 461.1098 [M+H] <sup>+</sup><br>463.1231 [M-H] <sup>-</sup>     | 1.9<br>-0.7 | 299.0564, 284.0333, 255.0304<br>301.0706, 270.0523, 241.0560, 213.0557 | Flavonoids    | HQ    |
| 30 | 4.58 | Vanillin                     | C <sub>8</sub> H <sub>8</sub> O <sub>3</sub>                  | 151.0404 [M-H] <sup>-</sup>                                    | 2.1         | 137.0236, 121.0287                                                     | Others        | DG    |
| 31 | 4.84 | Phthalic anhydride           | C <sub>8</sub> H <sub>4</sub> O <sub>3</sub>                  | 149.0231 [M+H] <sup>+</sup>                                    | -1.3        | 121.0290                                                               | Others        | DG    |
| 32 | 4.93 | Chlorogenic acid*            | C <sub>16</sub> H <sub>18</sub> O <sub>9</sub>                | 353.0882 [M-H] <sup>-</sup>                                    | 1.1         | 191.0563, 179.0347, 161.0238, 135.0452                                 | Organic acids | HQ/DG |
| 33 | 5.12 | Guaiacol                     | C <sub>7</sub> H <sub>8</sub> O <sub>2</sub>                  | 123.0455 [M-H] <sup>-</sup>                                    | 2.8         | 108.0224, 93.0344                                                      | Others        | DG    |
| 34 | 5.12 | Vanillic acid*               | C <sub>8</sub> H <sub>8</sub> O <sub>4</sub>                  | 167.0356 [M-H] <sup>-</sup>                                    | 3.5         | 152.0119, 123.0446                                                     | Organic acids | DG    |
| 35 | 5.33 | 3-Indoleacrylic acid         | C <sub>11</sub> H <sub>9</sub> NO <sub>2</sub>                | 188.0743 [M+H] <sup>+</sup>                                    | -4.8        | 170.0598, 142.0644                                                     | Others        | HQ/DG |
| 36 | 5.38 | Chlorogenic acid isomer      | C <sub>16</sub> H <sub>18</sub> O <sub>9</sub>                | 353.0882 [M-H] <sup>-</sup>                                    | 1.3         | 191.0571, 179.0347, 135.0454                                           | Organic acids | HQ/DG |
| 37 | 5.62 | Caffeic acid*                | C <sub>9</sub> H <sub>8</sub> O <sub>4</sub>                  | 179.0361 [M-H] <sup>-</sup>                                    | –           | 135.0451                                                               | Organic acids | HQ/DG |
| 38 | 6.02 | Icariside F2                 | C <sub>18</sub> H <sub>26</sub> O <sub>10</sub>               | 401.1457 [M-H] <sup>-</sup><br>425.1414 [M+Na] <sup>+</sup>    | 1<br>-1     | 269.1035, 193.0495<br>–                                                | Others        | DG    |
| 39 | 6.13 | Aspartic acid                | C <sub>4</sub> H <sub>7</sub> NO <sub>4</sub>                 | 132.0306 [M-H] <sup>-</sup>                                    | 2.7         | 88.0397                                                                | Amino acids   | HQ/DG |
| 40 | 6.53 | Octanoic acid                | C <sub>8</sub> H <sub>16</sub> O <sub>2</sub>                 | 189.1134 [M+HCOO] <sup>-</sup>                                 | 1           | 85.0290, 71.0133                                                       | Organic acids | DG    |

|    |      |                                          |                                                               |                                                               |             |                                                              |               |       |
|----|------|------------------------------------------|---------------------------------------------------------------|---------------------------------------------------------------|-------------|--------------------------------------------------------------|---------------|-------|
| 41 | 6.70 | Apigenin-7-O- $\beta$ -D-glucoside       | C <sub>21</sub> H <sub>20</sub> O <sub>10</sub>               | 431.0993 [M-H] <sup>-</sup>                                   | 2.1         | 269.0458, 239.0450, 211.0361, 135.0071                       | Flavonoids    | HQ    |
| 42 | 7.14 | Riboflavin*                              | C <sub>17</sub> H <sub>20</sub> N <sub>4</sub> O <sub>6</sub> | 377.1451 [M+H] <sup>+</sup>                                   | -1.3        | 243.0882, 198.0667, 172.0923                                 | Others        | HQ    |
| 43 | 7.24 | 7-Methoxycoumarin isomer                 | C <sub>10</sub> H <sub>8</sub> O <sub>3</sub>                 | 177.0548 [M+H] <sup>+</sup>                                   | 0.8         | 149.05594, 145.0269                                          | Coumarins     | DG    |
| 44 | 7.60 | Hesperetin 7-O-glucoside                 | C <sub>22</sub> H <sub>24</sub> O <sub>11</sub>               | 463.1253 [M-H] <sup>-</sup>                                   | 1.6         | 301.0659, 273.0758                                           | Flavonoids    | HQ    |
| 45 | 7.66 | Dimethyl phthalate                       | C <sub>10</sub> H <sub>10</sub> O <sub>4</sub>                | 193.0512 [M-H] <sup>-</sup>                                   | 3           | 178.0256, 134.0346                                           | Others        | DG    |
| 46 | 7.78 | 5-Feruloylquinic acid                    | C <sub>17</sub> H <sub>20</sub> O <sub>9</sub>                | 391.0512 [M+Na] <sup>+</sup><br>367.1037 [M-H] <sup>-</sup>   | -0.2<br>0.8 | 177.0540, 145.0269<br>191.0542, 173.0469, 134.0352           | Organic acids | DG    |
| 47 | 7.88 | N-Acetylphenylalanine                    | C <sub>11</sub> H <sub>13</sub> NO <sub>3</sub>               | 206.0827 [M-H] <sup>-</sup>                                   | 2.3         | 164.0700, 147.0429, 103.0535                                 | Amino acids   | HQ/DG |
| 48 | 8.02 | Pratensein-Glc-Glc                       | C <sub>28</sub> H <sub>32</sub> O <sub>16</sub>               | 623.1637 [M-H] <sup>-</sup>                                   | 3.1         | 461.1096, 299.0537, 284.0333, 255.0304, 135.0071             | Flavonoids    | HQ    |
| 49 | 8.28 | 7-Methoxycoumarin isomer                 | C <sub>10</sub> H <sub>8</sub> O <sub>3</sub>                 | 177.0543 [M+H] <sup>+</sup>                                   | -2          | 149.0594, 145.0297, 134.0386                                 | Coumarins     | DG    |
| 50 | 8.52 | Umbelliferone*                           | C <sub>9</sub> H <sub>6</sub> O <sub>3</sub>                  | 163.0387 [M+H] <sup>+</sup>                                   | -1.9        | 145.0350, 135.0462                                           | Coumarins     | DG    |
| 51 | 8.64 | Rhamnocitrin 3-neohesperidoside isomer   | C <sub>28</sub> H <sub>32</sub> O <sub>15</sub>               | 609.1812 [M+H] <sup>+</sup><br>653.1739 [M+HCOO] <sup>-</sup> | -0.4<br>2.5 | 285.0760, 270.0523, 225.0584<br>283.0594, 268.0333, 239.0282 | Flavonoids    | HQ    |
| 52 | 8.86 | 4'-O-beta-D-Glucosyl-5-O-methylvisaminol | C <sub>22</sub> H <sub>28</sub> O <sub>10</sub>               | 451.1613 [M-H] <sup>-</sup>                                   | 0.7         | 289.1013, 271.0976                                           | Flavonoids    | HQ    |
| 53 | 9.20 | Glycitin*                                | C <sub>22</sub> H <sub>22</sub> O <sub>10</sub>               | 491.1208 [M+HCOO] <sup>-</sup>                                | 2.6         | 445.1145, 283.0594, 268.0405, 239.0350                       | Flavonoids    | HQ    |
| 54 | 9.26 | 6-Methoxycoumarin                        | C <sub>10</sub> H <sub>8</sub> O <sub>3</sub>                 | 177.0547 [M+H] <sup>+</sup>                                   | 0.3         | 162.0281, 149.0631, 134.0386, 117.0332                       | Coumarins     | DG    |

|    |       |                                                                  |                                                               |                                                               |      |                                                                                                                                                                  |               |       |
|----|-------|------------------------------------------------------------------|---------------------------------------------------------------|---------------------------------------------------------------|------|------------------------------------------------------------------------------------------------------------------------------------------------------------------|---------------|-------|
| 55 | 9.27  | Ferulic acid*                                                    | C <sub>10</sub> H <sub>10</sub> O <sub>4</sub>                | 193.0515 [M-H] <sup>-</sup>                                   | 4.4  | 178.0256, 149.0614, 134.0352                                                                                                                                     | Organic acids | HQ/DG |
| 56 | 9.41  | Sinapic acid                                                     | C <sub>11</sub> H <sub>12</sub> O <sub>5</sub>                | 223.0619 [M-H] <sup>-</sup>                                   | 2.9  | 208.0334, 193.0149, 149.0232, 121.0288                                                                                                                           | Organic acids | HQ    |
| 57 | 9.47  | Valerosidatum                                                    | C <sub>21</sub> H <sub>34</sub> O <sub>11</sub>               | 485.1994 [M+Na] <sup>+</sup>                                  | 0.1  | 301.1643                                                                                                                                                         | Others        | DG    |
| 58 | 9.52  | Licoagroside D or isomer                                         | C <sub>22</sub> H <sub>24</sub> O <sub>10</sub>               | 447.1300 [M-H] <sup>-</sup>                                   | 0.7  | 285.0761, 270.0536                                                                                                                                               | Flavonoids    | HQ    |
| 59 | 9.62  | N-Acetyltryptophan                                               | C <sub>13</sub> H <sub>14</sub> N <sub>2</sub> O <sub>3</sub> | 245.0931 [M-H] <sup>-</sup>                                   | 2    | 203.0820, 142.0671                                                                                                                                               | Amino acids   | HQ/DG |
| 60 | 9.86  | Rhamnocitrin 3-neohesperidoside isomer                           | C <sub>28</sub> H <sub>32</sub> O <sub>15</sub>               | 607.1682 [M-H] <sup>-</sup>                                   | 2.3  | 283.0594, 268.0333                                                                                                                                               | Flavonoids    | HQ    |
| 61 | 9.87  | Liquiritin                                                       | C <sub>21</sub> H <sub>22</sub> O <sub>9</sub>                | 417.1179 [M-H] <sup>-</sup>                                   | -1.6 | 255.0674, 135.0071, 119.0480                                                                                                                                     | Flavonoids    | HQ    |
| 62 | 10.02 | Dimethyl azelate                                                 | C <sub>11</sub> H <sub>20</sub> O <sub>4</sub>                | 261.1350 [M+HCOO] <sup>-</sup>                                | 2.3  | 201.1129                                                                                                                                                         | Others        | DG    |
| 63 | 10.05 | Isoferulic Acid*                                                 | C <sub>10</sub> H <sub>10</sub> O <sub>4</sub>                | 193.0512 [M-H] <sup>-</sup>                                   | 3.1  | 178.0285, 134.0346                                                                                                                                               | Organic acids | HQ/DG |
| 64 | 10.07 | Tamarixin                                                        | C <sub>22</sub> H <sub>22</sub> O <sub>12</sub>               | 477.1044 [M-H] <sup>-</sup>                                   | 1.1  | 315.0457, 300.0211, 271.0230, 151.0025                                                                                                                           | Flavonoids    | HQ    |
| 65 | 10.35 | Calycosin-7-O-β-D-glucoside*                                     | C <sub>22</sub> H <sub>22</sub> O <sub>10</sub>               | 447.1293 [M+H] <sup>+</sup><br>491.1207 [M+HCOO] <sup>-</sup> | 2.4  | 285.0830, 270.0594, 253.0552, 225.0584, 213.0621, 197.0629, 137.0267<br>283.0629, 268.0333, 239.0282, 224.0456, 211.0361, 195.0467, 183.0453, 148.0173, 135.0082 | Flavonoids    | HQ    |
| 66 | 10.44 | (+)Lariciresinol-4'-O-β-D-Apiofuranosyl-(1-2)-β-D-Glucopyranosyl | C <sub>31</sub> H <sub>42</sub> O <sub>15</sub>               | 653.2448 [M-H] <sup>-</sup>                                   | -0.5 | 329.1366                                                                                                                                                         | Lignans       | HQ    |



|    |       |                                                            |                                                 |                                                                |      |                                                                         |               |       |
|----|-------|------------------------------------------------------------|-------------------------------------------------|----------------------------------------------------------------|------|-------------------------------------------------------------------------|---------------|-------|
| 67 | 10.57 | Salicylic acid*                                            | C <sub>7</sub> H <sub>6</sub> O <sub>3</sub>    | 137.0253 [M-H] <sup>-</sup>                                    | -    | 93.0323                                                                 | Organic acids | HQ    |
| 68 | 10.65 | Sissotrin                                                  | C <sub>22</sub> H <sub>22</sub> O <sub>10</sub> | 469.1112 [M+Na] <sup>+</sup><br>491.1207 [M+HCOO] <sup>-</sup> | 2.4  | 447.1300, 285.0757, 270.0594<br>283.0594, 268.0333, 239.0417, 211.0297  | Flavonoids    | HQ    |
| 69 | 10.96 | Astragalin                                                 | C <sub>21</sub> H <sub>20</sub> O <sub>11</sub> | 447.0943 [M-H] <sup>-</sup>                                    | 2.4  | 285.0392, 256.0378                                                      | Flavonoids    | HQ    |
| 70 | 11.40 | 3'-methoxy-5'-hydroxy-isoflavanone-7-O-β-D-glucopyranoside | C <sub>22</sub> H <sub>22</sub> O <sub>10</sub> | 445.1144 [M-H] <sup>-</sup>                                    | 0.9  | 283.0594, 268.0373, 239.0350, 135.0071                                  | Flavonoids    | HQ    |
| 71 | 11.70 | 5,8-Di(2,3-dihydroxy-3-methylbutoxy)-psoralen              | C <sub>21</sub> H <sub>26</sub> O <sub>9</sub>  | 445.1473 [M+Na] <sup>+</sup>                                   | 0.8  | 423.1617                                                                | Coumarins     | DG    |
| 72 | 11.82 | Isomucronulatol-7,3'-di-glucoside                          | C <sub>28</sub> H <sub>36</sub> O <sub>15</sub> | 611.1972 [M-H] <sup>-</sup>                                    | -1.5 | 449.1463, 287.0930, 272.0669, 135.0436                                  | Flavonoids    | HQ    |
| 73 | 12.18 | Senkyunolide S                                             | C <sub>12</sub> H <sub>16</sub> O <sub>5</sub>  | 239.0927 [M-H] <sup>-</sup>                                    | 1    | 195.1016, 175.0788                                                      | Phthalides    | DG    |
| 74 | 12.43 | 9-(2,3-dihydroxypropoxy)-9-oxononanoic acid                | C <sub>12</sub> H <sub>22</sub> O <sub>6</sub>  | 261.1350 [M-H] <sup>-</sup>                                    | 2.5  | 187.0971, 169.0865, 125.0966                                            | Organic acids | HQ    |
| 75 | 12.60 | Z-6,7-epoxyligustilide                                     | C <sub>12</sub> H <sub>14</sub> O <sub>3</sub>  | 207.1014 [M+H] <sup>+</sup>                                    | -0.7 | 189.0927                                                                | Phthalides    | DG    |
| 76 | 12.62 | Hesperidin isomer                                          | C <sub>28</sub> H <sub>34</sub> O <sub>15</sub> | 609.1832 [M-H] <sup>-</sup>                                    | 1.1  | 301.0703                                                                | Flavonoids    | HQ    |
| 77 | 13.22 | 1,3-Dicaffeoylquinic acid                                  | C <sub>25</sub> H <sub>24</sub> O <sub>12</sub> | 515.1204 [M-H] <sup>-</sup>                                    | 1.8  | 353.0887, 335.0825, 191.0552, 179.0343,<br>173.0447, 161.0242, 135.0457 | Organic acids | DG    |
| 78 | 13.24 | Licoagroside D or isomer                                   | C <sub>22</sub> H <sub>24</sub> O <sub>10</sub> | 447.1296 [M-H] <sup>-</sup>                                    | -0.1 | 285.0762, 270.0522, 135.0085                                            | Flavonoids    | HQ    |
| 79 | 13.36 | Azelaic acid                                               | C <sub>9</sub> H <sub>16</sub> O <sub>4</sub>   | 187.0985 [M-H] <sup>-</sup>                                    | 4.6  | 143.1093, 125.0969                                                      | Organic acids | HQ/DG |

|           |       |                                                            |                                                 |                                                               |            |                                                                                            |               |    |
|-----------|-------|------------------------------------------------------------|-------------------------------------------------|---------------------------------------------------------------|------------|--------------------------------------------------------------------------------------------|---------------|----|
| <b>80</b> | 13.88 | 1,4-Dicaffeoylquinic acid                                  | C <sub>25</sub> H <sub>24</sub> O <sub>12</sub> | 515.1211 [M-H] <sup>-</sup>                                   | 3.1        | 353.0844, 191.0560, 179.0356, 135.0447                                                     | Organic acids | DG |
| <b>81</b> | 13.93 | Genistin*                                                  | C <sub>21</sub> H <sub>20</sub> O <sub>10</sub> | 431.0992 [M-H] <sup>-</sup>                                   | 2          | 268.0370, 239.0340, 211.0404, 151.0064                                                     | Flavonoids    | HQ |
| <b>82</b> | 13.98 | Afrormosin 7-O-glucoside                                   | C <sub>23</sub> H <sub>24</sub> O <sub>10</sub> | 505.1355 [M+HCOO] <sup>-</sup>                                | 0.7        | 297.0752, 282.0511, 267.0288, 239.0334                                                     | Flavonoids    | HQ |
| <b>83</b> | 14.02 | Calycosin-7-O-β-D-glucoside-6"-O-malonate or isomer        | C <sub>25</sub> H <sub>24</sub> O <sub>13</sub> | 533.1302 [M+H] <sup>+</sup>                                   | 2.3        | 285.0760, 270.0594, 253.0552, 137.0267                                                     | Flavonoids    | HQ |
| <b>84</b> | 14.03 | Senkyunolide I*                                            | C <sub>12</sub> H <sub>16</sub> O <sub>4</sub>  | 247.0940 [M+Na] <sup>+</sup>                                  | -0.5       | 207.1042, 189.0934, 161.0953                                                               | Phthalides    | DG |
| <b>85</b> | 14.07 | (-)-Syringaresinol-4-O-beta-D-apiofuranos                  | C <sub>33</sub> H <sub>44</sub> O <sub>17</sub> | 711.2509 [M-H] <sup>-</sup>                                   | 1.2        | 417.1544, 402.1305, 387.1100, 181.0506, 166.0280, 151.0030                                 | Lignans       | HQ |
| <b>86</b> | 14.24 | 3'-hydroxy-5'-methoxy-isoflavanone-7-O-β-D-glucopyranoside | C <sub>22</sub> H <sub>22</sub> O <sub>10</sub> | 469.1113 [M+Na] <sup>+</sup><br>445.1147 [M-H] <sup>-</sup>   | 1.2<br>1.6 | 285.0760<br>283.0612, 268.0364, 239.0356, 135.0087                                         | Flavonoids    | HQ |
| <b>87</b> | 14.37 | (+)-7-epi-Syringaresinol 4'-glucoside                      | C <sub>28</sub> H <sub>36</sub> O <sub>13</sub> | 579.2074 [M-H] <sup>-</sup>                                   | -0.6       | 417.1447, 402.1284, 387.1038, 181.0478, 166.0248, 151.0023                                 | Lignans       | HQ |
| <b>88</b> | 14.57 | 4'-methoxy-kaempferol-3-O-β-D-glucoside                    | C <sub>22</sub> H <sub>22</sub> O <sub>11</sub> | 463.1243 [M+H] <sup>+</sup><br>507.1149 [M+HCOO] <sup>-</sup> | 1.8<br>0.9 | 301.0706, 286.0472, 269.0490, 241.0560, 153.0222<br>299.0559, 284.0326, 255.0281, 151.0033 | Flavonoids    | HQ |
| <b>89</b> | 14.64 | Calycosin-7-O-β-D-glucoside-6"-O-malonate or isomer        | C <sub>25</sub> H <sub>24</sub> O <sub>13</sub> | 533.1299 [M+H] <sup>+</sup>                                   | 1.8        | 285.0760, 270.0594, 137.0297                                                               | Flavonoids    | HQ |
| <b>90</b> | 14.64 | Senkyunolide J or isomer                                   | C <sub>12</sub> H <sub>18</sub> O <sub>4</sub>  | 225.1136 [M-H] <sup>-</sup>                                   | 1.5        | 207.1032, 181.1250, 163.1122                                                               | Phthalides    | DG |
| <b>91</b> | 14.79 | Isomucronulatol-7,2'-di-glucoside                          | C <sub>29</sub> H <sub>38</sub> O <sub>15</sub> | 625.213 [M-H] <sup>-</sup>                                    | -1.2       | 463.1619, 301.1081, 286.0881, 271.0626, 121.0289                                           | Flavonoids    | HQ |

|            |       |                                                     |                                                 |                                                               |             |                                                                                  |               |    |
|------------|-------|-----------------------------------------------------|-------------------------------------------------|---------------------------------------------------------------|-------------|----------------------------------------------------------------------------------|---------------|----|
| <b>92</b>  | 14.85 | Unknown                                             | C <sub>31</sub> H <sub>34</sub> O <sub>18</sub> | 695.1813 [M+H] <sup>+</sup>                                   | -1          | 285.0755, 270.0526                                                               | Flavonoids    | HQ |
| <b>93</b>  | 15.13 | Senkyunolide H-7-Acetate                            | C <sub>14</sub> H <sub>18</sub> O <sub>5</sub>  | 265.1062 [M-H] <sup>-</sup>                                   | -           | 247.0959, 221.1156                                                               | Phthalides    | DG |
| <b>94</b>  | 15.24 | Senkyunolide J or isomer                            | C <sub>12</sub> H <sub>18</sub> O <sub>4</sub>  | 225.1138 [M-H] <sup>-</sup>                                   | 2.5         | 207.1022, 181.1260, 163.1116                                                     | Phthalides    | DG |
| <b>95</b>  | 15.71 | 3,9-dihydroxygustilide                              | C <sub>12</sub> H <sub>16</sub> O <sub>4</sub>  | 247.0936 [M+Na] <sup>+</sup>                                  | -2.1        | 207.1042, 189.0927                                                               | Phthalides    | DG |
| <b>96</b>  | 15.84 | Hesperidin*                                         | C <sub>28</sub> H <sub>34</sub> O <sub>15</sub> | 633.1789 [M+Na] <sup>+</sup><br>609.1831 [M-H] <sup>-</sup>   | -0.1<br>0.9 | 303.0883<br>301.0712                                                             | Flavonoids    | HQ |
| <b>97</b>  | 16.21 | 3,4-Dicaffeoylquinic acid                           | C <sub>25</sub> H <sub>24</sub> O <sub>12</sub> | 515.1206 [M-H] <sup>-</sup>                                   | 2.1         | 353.0870, 191.0550, 179.0355, 173.0445, 135.0443                                 | Organic acids | DG |
| <b>98</b>  | 16.26 | Calycosin-7-O-β-D-glucoside-6"-O-malonate or isomer | C <sub>25</sub> H <sub>24</sub> O <sub>13</sub> | 533.1300 [M+H] <sup>+</sup><br>1063.2357 [2M-H] <sup>-</sup>  | 1.9<br>-0.3 | 285.0760, 270.0594, 253.0552, 137.0267<br>283.0617, 268.0376                     | Flavonoids    | HQ |
| <b>99</b>  | 16.55 | Ononin-Glc                                          | C <sub>28</sub> H <sub>32</sub> O <sub>14</sub> | 593.1852 [M+H] <sup>+</sup>                                   | -3          | 269.0806, 254.0574, 237.0542, 226.0624, 213.0898                                 | Flavonoids    | HQ |
| <b>100</b> | 17.41 | Glycyroside                                         | C <sub>27</sub> H <sub>30</sub> O <sub>13</sub> | 563.1765 [M+H] <sup>+</sup><br>561.1614 [M-H] <sup>-</sup>    | 0<br>1      | 269.0816, 254.0563<br>267.0665, 252.0424                                         | Flavonoids    | HQ |
| <b>101</b> | 17.41 | Pharsyringaresinol                                  | C <sub>30</sub> H <sub>38</sub> O <sub>14</sub> | 621.2192 [M-H] <sup>-</sup>                                   | 1.4         | 417.1536, 402.1324, 387.1068, 181.0508, 166.0270, 151.0034, 137.0251             | Lignans       | HQ |
| <b>102</b> | 17.45 | 7-Methoxycoumarin*                                  | C <sub>10</sub> H <sub>8</sub> O <sub>3</sub>   | 177.0540 [M+H] <sup>+</sup>                                   | 0.3         | 145.0269                                                                         | Coumarins     | DG |
| <b>103</b> | 17.46 | (+)-Syringaresinol                                  | C <sub>22</sub> H <sub>26</sub> O <sub>8</sub>  | 417.1568 [M-H] <sup>-</sup>                                   | 3.1         | 402.1324, 387.1084, 181.0508, 166.0273, 151.0041, 137.0246                       | Lignans       | HQ |
| <b>104</b> | 17.78 | Ononin*                                             | C <sub>22</sub> H <sub>22</sub> O <sub>9</sub>  | 431.1341 [M+H] <sup>+</sup><br>475.1261 [M+HCOO] <sup>-</sup> | 3.3         | 269.0810, 254.0574, 237.0545, 226.0629, 213.0910<br>267.0662, 252.0423, 223.0395 | Flavonoids    | HQ |
| <b>105</b> | 18.48 | Isomucronulatol-7,2'-di-glucoside or isomer         | C <sub>29</sub> H <sub>38</sub> O <sub>15</sub> | 625.2137 [M-H] <sup>-</sup>                                   | -0.2        | 463.1608, 301.1068, 286.0849, 121.0289                                           | Flavonoids    | HQ |

|     |       |                                           |                                                 |                                                               |             |                                                                                               |            |    |
|-----|-------|-------------------------------------------|-------------------------------------------------|---------------------------------------------------------------|-------------|-----------------------------------------------------------------------------------------------|------------|----|
| 106 | 18.86 | Liquiritigenin*                           | C <sub>15</sub> H <sub>12</sub> O <sub>4</sub>  | 257.0807 [M+H] <sup>+</sup><br>255.0670 [M-H] <sup>-</sup>    | 2.7         | 147.0451, 137.0234<br>135.0085, 119.0498                                                      | Flavonoids | HQ |
| 107 | 18.90 | Daidzein*                                 | C <sub>15</sub> H <sub>10</sub> O <sub>4</sub>  | 255.0670 [M+H] <sup>+</sup><br>253.0514 [M-H] <sup>-</sup>    | 3.1         | 137.0244<br>225.0548, 135.0081                                                                | Flavonoids | HQ |
| 108 | 19.20 | Rhamnocitrin 3-O-glucoside                | C <sub>22</sub> H <sub>22</sub> O <sub>11</sub> | 461.1099 [M-H] <sup>-</sup>                                   | 2.2         | 299.0549, 285.0440, 255.0276                                                                  | Flavonoids | HQ |
| 109 | 19.38 | Uralene                                   | C <sub>21</sub> H <sub>20</sub> O <sub>7</sub>  | 383.1138 [M-H] <sup>-</sup>                                   | 0.4         | 353.0674, 337.0712                                                                            | Flavonoids | DG |
| 110 | 19.58 | Calycosin-7-O-β-D-(6"-O-acetyl)-glucoside | C <sub>24</sub> H <sub>24</sub> O <sub>11</sub> | 489.1402 [M+H] <sup>+</sup><br>533.135 [M+HCOO] <sup>-</sup>  | 0.8         | 285.0762, 270.0533, 137.0244<br>283.0606, 268.0365, 239.0333                                  | Flavonoids | HQ |
| 111 | 19.77 | 3-Hydro-9,10-diMP-Pen-Glc                 | C <sub>28</sub> H <sub>34</sub> O <sub>14</sub> | 593.1902 [M-H] <sup>-</sup>                                   | 5           | 299.0921, 284.0688, 269.0454, 241.0497                                                        | Flavonoids | HQ |
| 112 | 19.80 | Prunin                                    | C <sub>21</sub> H <sub>22</sub> O <sub>10</sub> | 433.1150 [M-H] <sup>-</sup>                                   | 2.3         | 271.0606, 243.0650                                                                            | Flavonoids | HQ |
| 113 | 20.29 | Coniferyl ferulate                        | C <sub>20</sub> H <sub>20</sub> O <sub>6</sub>  | 401.1242 [M+HCOO] <sup>-</sup>                                | 0.1         | 206.0579, 191.0356                                                                            | Others     | DG |
| 114 | 20.31 | Glycitein*                                | C <sub>16</sub> H <sub>12</sub> O <sub>5</sub>  | 285.0755 [M+H] <sup>+</sup><br>283.0618 [M-H] <sup>-</sup>    | -0.8<br>0.5 | 270.0528, 253.0493, 137.0241<br>268.0391, 239.0347, 211.0405, 135.0087                        | Flavonoids | HQ |
| 115 | 20.59 | Methylinissolin-3-O-β-D-glucoside         | C <sub>23</sub> H <sub>26</sub> O <sub>10</sub> | 485.1421 [M+H] <sup>+</sup><br>507.1506 [M+HCOO] <sup>-</sup> | 0.6<br>-0.3 | 301.1085, 269.0805, 167.0703<br>299.0913, 284.0675, 269.0440, 241.0488                        | Flavonoids | HQ |
| 116 | 20.87 | Pratensein                                | C <sub>16</sub> H <sub>12</sub> O <sub>6</sub>  | 301.0711 [M+Na] <sup>+</sup><br>299.0567 [M-H] <sup>-</sup>   | 1.6<br>1.9  | 286.0467, 269.0457, 241.0491, 153.0172,<br>134.0367<br>284.0320, 255.0292, 227.0345           | Flavonoids | HQ |
| 117 | 20.99 | Unknown                                   | C <sub>28</sub> H <sub>34</sub> O <sub>14</sub> | 593.1877 [M-H] <sup>-</sup>                                   | 0.3         | 505.1706, 417.1552, 402.1307, 387.1073,<br>181.0502, 166.0269, 151.0031                       | Lignans    | HQ |
| 118 | 21.14 | 3,7,8-trihydroxy-4-methoxyisoflavone      | C <sub>16</sub> H <sub>12</sub> O <sub>6</sub>  | 299.0566 [M-H] <sup>-</sup>                                   | 1.7         | 284.0311, 269.0477, 255.0304, 151.0025                                                        | Flavonoids | HQ |
| 119 | 21.83 | Calycosin*                                | C <sub>16</sub> H <sub>12</sub> O <sub>5</sub>  | 285.0759 [M+H] <sup>+</sup><br>283.0618 [M-H] <sup>-</sup>    | 0.4<br>2.1  | 270.0526, 253.0500, 225.0554, 213.0553,<br>137.0241<br>268.0391, 239.0347, 211.0405, 135.0087 | Flavonoids | HQ |

|            |       |                                                        |                                                 |                                                             |            |                                                                                               |            |    |
|------------|-------|--------------------------------------------------------|-------------------------------------------------|-------------------------------------------------------------|------------|-----------------------------------------------------------------------------------------------|------------|----|
| <b>120</b> | 22.62 | Isomucronulatol-7-O- $\beta$ -D-glucoside              | C <sub>23</sub> H <sub>28</sub> O <sub>10</sub> | 487.1581 [M+Na] <sup>+</sup><br>463.1617 [M-H] <sup>-</sup> | 1.4<br>1.6 | 303.1231, 167.0731<br>301.1080, 286.0837, 271.0603, 179.0696,<br>164.0471, 135.0447, 121.0290 | Flavonoids | HQ |
| <b>121</b> | 23.41 | Kumatakenin                                            | C <sub>17</sub> H <sub>14</sub> O <sub>6</sub>  | 313.0722 [M-H] <sup>-</sup>                                 | 1.4        | 298.0501, 283.0226, 255.0325, 227.0362                                                        | Flavonoids | HQ |
| <b>122</b> | 23.78 | Senkyunolide D                                         | C <sub>12</sub> H <sub>14</sub> O <sub>4</sub>  | 221.0822 [M-H] <sup>-</sup>                                 | 1          | 177.0915                                                                                      | Phthalides | DG |
| <b>123</b> | 23.86 | Formononetin-7-O- $\beta$ -D-glucoside-6"-O-malonate   | C <sub>25</sub> H <sub>24</sub> O <sub>12</sub> | 517.1347 [M+H] <sup>+</sup>                                 | 1.3        | 269.0823, 254.0575, 237.0551, 226.0629,<br>213.0919, 197.0605, 137.0241                       | Flavonoids | HQ |
| <b>124</b> | 24.62 | Odoratin                                               | C <sub>17</sub> H <sub>14</sub> O <sub>6</sub>  | 313.0726 [M-H] <sup>-</sup>                                 | 2.6        | 298.0426, 283.0299, 269.0495                                                                  | Flavonoids | HQ |
| <b>125</b> | 24.98 | Dihydrocapsaicin                                       | C <sub>18</sub> H <sub>29</sub> NO <sub>3</sub> | 308.2220 [M+H] <sup>+</sup>                                 | -0.2       | 290.2122, 262.2155, 136.0758, 122.0603                                                        | Others     | HQ |
| <b>126</b> | 25.08 | Astrapterocarpan-glucoside-6"-O-malonate               | C <sub>26</sub> H <sub>28</sub> O <sub>13</sub> | 571.1426 [M+Na] <sup>+</sup>                                | 0.7        | 549.1621, 301.1077, 167.0712                                                                  | Flavonoids | HQ |
| <b>127</b> | 25.23 | Methylnissolin-3-O- $\beta$ -D-(6'-O-acetyl)-glucoside | C <sub>25</sub> H <sub>28</sub> O <sub>11</sub> | 549.1624 [M+HCOO] <sup>-</sup>                              | 2          | 299.0924, 284.0685, 269.0457, 241.0510                                                        | Flavonoids | HQ |
| <b>128</b> | 25.64 | Genistein*                                             | C <sub>15</sub> H <sub>10</sub> O <sub>5</sub>  | 271.0600 [M+H] <sup>+</sup>                                 | -0.3       | 153.0172                                                                                      | Flavonoids | HQ |
| <b>129</b> | 26.11 | 5,7-Dihydroxy-4-methoxyisoflavone                      | C <sub>16</sub> H <sub>12</sub> O <sub>5</sub>  | 285.0758 [M+H] <sup>+</sup>                                 | 0.1        | 270.0535, 253.0478, 225.0549, 213.0552,<br>137.0248                                           | Flavonoids | HQ |
| <b>130</b> | 26.56 | Pendulone                                              | C <sub>17</sub> H <sub>16</sub> O <sub>6</sub>  | 317.1020 [M+H] <sup>+</sup><br>315.0880 [M-H] <sup>-</sup>  | 0.3<br>1.7 | 299.0919, 135.0442<br>285.0399                                                                | Flavonoids | HQ |
| <b>131</b> | 26.89 | Isomucronulatol-acetyl-Glc                             | C <sub>25</sub> H <sub>30</sub> O <sub>11</sub> | 505.1690 [M-H] <sup>-</sup>                                 | -3.9       | 301.1078, 286.0836, 271.0603, 179.0704,<br>164.0483, 149.0240, 135.0444, 121.0287             | Flavonoids | HQ |
| <b>132</b> | 26.98 | Afrormosin                                             | C <sub>17</sub> H <sub>14</sub> O <sub>5</sub>  | 299.0914 [M+H] <sup>+</sup>                                 | 0          | 283.0594, 255.0662, 237.0570                                                                  | Flavonoids | HQ |

|            |       |                                               |                                                 |                                                                |             |                                                                                               |               |    |
|------------|-------|-----------------------------------------------|-------------------------------------------------|----------------------------------------------------------------|-------------|-----------------------------------------------------------------------------------------------|---------------|----|
| <b>133</b> | 27.74 | 6"-O-acetylononin                             | C <sub>24</sub> H <sub>24</sub> O <sub>10</sub> | 473.1446 [M+H] <sup>+</sup><br>517.1361 [M+HCOO] <sup>-</sup>  | 0.7<br>1.8  | 269.0812, 254.0571, 237.0546, 226.0629,<br>213.0909<br>267.0643, 252.0423                     | Flavonoids    | HQ |
| <b>134</b> | 28.11 | Astramembranoside A                           | C <sub>42</sub> H <sub>70</sub> O <sub>15</sub> | 813.4633 [M-H] <sup>-</sup>                                    | -1.1        | 651.4075, 489.3566                                                                            | Saponins      | HQ |
| <b>135</b> | 28.27 | 7-Methyl-kaempferol                           | C <sub>16</sub> H <sub>12</sub> O <sub>6</sub>  | 301.0710 [M+H] <sup>+</sup><br>299.0569 [M-H] <sup>-</sup>     | 1.3<br>2.7  | 286.0471, 269.0450, 241.0503, 153.0185<br>284.0321, 255.0289, 227.0347                        | Flavonoids    | HQ |
| <b>136</b> | 28.29 | Senkyunolide F                                | C <sub>12</sub> H <sub>14</sub> O <sub>3</sub>  | 205.0876 [M-H] <sup>-</sup>                                    | 2.7         | 187.0758, 161.0974                                                                            | Phthalides    | DG |
| <b>137</b> | 28.65 | 9,12,13-Trihydroxyoctadeca-10,15-dienoic acid | C <sub>18</sub> H <sub>32</sub> O <sub>5</sub>  | 327.2186 [M-H] <sup>-</sup>                                    | 2.7         | 309.2066, 291.1954, 239.1648, 211.1333,<br>171.1022                                           | Organic acids | DG |
| <b>138</b> | 28.97 | 9,10,11-Trihydroxyoctadeca-12,15-dienoic acid | C <sub>18</sub> H <sub>32</sub> O <sub>5</sub>  | 327.2181 [M-H] <sup>-</sup>                                    | 1.3         | 291.1955, 229.1452, 211.1346, 171.1029                                                        | Organic acids | DG |
| <b>139</b> | 29.57 | Astragaloside IV, V, VI or VII                | C <sub>47</sub> H <sub>78</sub> O <sub>19</sub> | 991.5127 [M+HCOO] <sup>-</sup>                                 | 0.8         | 945.5035, 783.4551, 765.4337                                                                  | Saponins      | HQ |
| <b>140</b> | 29.84 | Astramembranoside B                           | C <sub>41</sub> H <sub>70</sub> O <sub>14</sub> | 831.4737 [M+HCOO] <sup>-</sup>                                 | -1.3        | 785.4659, 653.4342, 491.3750                                                                  | Saponins      | HQ |
| <b>141</b> | 30.36 | Astragaloside IV, V, VI or VII                | C <sub>47</sub> H <sub>78</sub> O <sub>19</sub> | 945.5071 [M-H] <sup>-</sup>                                    | 0.6         | 783.4514, 651.4105, 621.3971, 489.3550                                                        | Saponins      | HQ |
| <b>142</b> | 30.44 | Astragaloside IV, V, VI or VII                | C <sub>47</sub> H <sub>78</sub> O <sub>19</sub> | 969.5018 [M+Na] <sup>+</sup><br>991.5126 [M+HCOO] <sup>-</sup> | -1.2<br>0.6 | 473.3618, 455.3630, 437.3375, 419.3280<br>945.5054, 783.4525, 651.4090, 621.3971,<br>489.3556 | Saponins      | HQ |
| <b>143</b> | 30.68 | 6,7-Epoxyiligustilide                         | C <sub>12</sub> H <sub>14</sub> O <sub>3</sub>  | 205.0876 [M-H] <sup>-</sup>                                    | 2.9         | 161.0955                                                                                      | Phthalides    | DG |
| <b>144</b> | 30.69 | Formononetin*                                 | C <sub>16</sub> H <sub>12</sub> O <sub>4</sub>  | 269.0811 [M+H] <sup>+</sup><br>267.0672 [M-H] <sup>-</sup>     | 0.8<br>3.4  | 254.0568, 237.0551, 226.0624, 213.0918<br>252.0422, 223.0392, 195.0449, 135.0082              | Flavonoids    | HQ |
| <b>145</b> | 31.08 | Cycloaraloside E                              | C <sub>42</sub> H <sub>70</sub> O <sub>15</sub> | 859.4693 [M+HCOO] <sup>-</sup>                                 | -0.5        | 813.4651, 651.4159                                                                            | Saponins      | HQ |

|     |       |                                           |                                                 |                                                                  |              |                                                                                                                             |               |       |
|-----|-------|-------------------------------------------|-------------------------------------------------|------------------------------------------------------------------|--------------|-----------------------------------------------------------------------------------------------------------------------------|---------------|-------|
| 146 | 31.19 | 9,10,13-trihydroxy-11-octadecenoic acid   | C <sub>18</sub> H <sub>34</sub> O <sub>5</sub>  | 329.2338 [M-H] <sup>-</sup>                                      | 1.3          | 293.2117, 211.1334, 171.1025                                                                                                | Organic acids | HQ/DG |
| 147 | 31.32 | Methylnissolin                            | C <sub>17</sub> H <sub>16</sub> O <sub>5</sub>  | 301.1071 [M+H] <sup>+</sup><br>299.0929 [M-H] <sup>-</sup>       | 0.2<br>1.3   | 269.0802, 167.0708<br>284.0660, 269.0447, 241.0493, 213.0545                                                                | Flavonoids    | HQ    |
| 148 | 31.34 | Cyclocanthoside E                         | C <sub>41</sub> H <sub>70</sub> O <sub>14</sub> | 831.4736 [M+HCOO] <sup>-</sup>                                   | -1.4         | 785.4650, 623.4155, 491.3721                                                                                                | Saponins      | HQ    |
| 149 | 31.55 | Isoastragaloside IV                       | C <sub>41</sub> H <sub>68</sub> O <sub>14</sub> | 829.4573 [M+HCOO] <sup>-</sup><br>807.4490 [M+Na] <sup>+</sup>   | -2.2<br>-1.4 | 783.4521, 651.4015, 621.3931, 489.3558<br>627.3904                                                                          | Saponins      | HQ    |
| 150 | 31.86 | Agroastragaloside IV                      | C <sub>49</sub> H <sub>80</sub> O <sub>20</sub> | 1011.5118 [M+Na] <sup>+</sup><br>1033.5236 [M+HCOO] <sup>-</sup> | -1.7<br>1.1  | 831.4504, 651.3903<br>987.5211, 945.5112, 927.4967, 783.4562                                                                | Saponins      | HQ    |
| 151 | 32.16 | Astragaloside IV isomer                   | C <sub>41</sub> H <sub>68</sub> O <sub>14</sub> | 807.4482 [M+Na] <sup>+</sup><br>829.4591 [M+HCOO] <sup>-</sup>   | -2.3<br>0    | 473.3618, 455.3530, 437.3414, 419.3280<br>783.4540, 621.3983                                                                | Saponins      | HQ    |
| 152 | 32.22 | Isocyclocanthosides E                     | C <sub>41</sub> H <sub>70</sub> O <sub>14</sub> | 831.4755 [M+HCOO] <sup>-</sup>                                   | 0.9          | 785.4687, 623.4183, 491.3702                                                                                                | Saponins      | HQ    |
| 153 | 32.51 | Clethroidoside B                          | C <sub>49</sub> H <sub>80</sub> O <sub>20</sub> | 1033.5242 [M+HCOO] <sup>-</sup><br>1011.5126 [M+Na] <sup>+</sup> | 1.6<br>-0.9  | 987.5148, 945.5012, 927.4910, 783.4483<br>989.5342, 455.3530, 437.3417, 419.3313                                            | Saponins      | HQ    |
| 154 | 32.72 | (Z)-5,8,11-trihydroxyoctadec-9-enoic acid | C <sub>18</sub> H <sub>34</sub> O <sub>5</sub>  | 329.2337 [M-H] <sup>-</sup>                                      | 1.1          | 311.2230, 293.2129, 211.1317, 171.1031                                                                                      | Organic acids | HQ/DG |
| 155 | 32.94 | Astragaloside IV, V, VI or VII            | C <sub>47</sub> H <sub>78</sub> O <sub>19</sub> | 991.5124 [M+HCOO] <sup>-</sup><br>969.5021 [M+Na] <sup>+</sup>   | 0.4<br>-0.9  | 945.5060, 783.4525, 651.6053, 621.4000,<br>489.3554, 471.3450, 453.3347, 435.3416<br>473.3618, 455.3530, 437.3375, 419.3280 | Saponins      | HQ    |
| 156 | 33.43 | Senkyunolide E or isomer                  | C <sub>12</sub> H <sub>12</sub> O <sub>3</sub>  | 205.0858 [M+H] <sup>+</sup><br>203.0720 [M-H] <sup>-</sup>       | -0.8<br>3.3  | 187.0757, 159.0817<br>173.0235, 160.0168, 145.0277, 132.0217                                                                | Phthalides    | DG    |
| 157 | 33.70 | Agroastragaloside II                      | C <sub>43</sub> H <sub>72</sub> O <sub>15</sub> | 873.4848 [M+HCOO] <sup>-</sup>                                   | -0.1         | 827.4793, 785.4664, 767.4606, 605.4104                                                                                      | Saponins      | HQ    |
| 158 | 33.97 | Unknown                                   | C <sub>41</sub> H <sub>65</sub> O <sub>14</sub> | 781.4388 [M-H] <sup>-</sup>                                      | 1.7          | 619.3851, 487.3465, 469.3372                                                                                                | Saponins      | HQ    |
| 159 | 34.10 | Astragaloside II                          | C <sub>43</sub> H <sub>70</sub> O <sub>15</sub> | 849.4611 [M+Na] <sup>+</sup>                                     | 0.4          | 455.3530, 437.3466, 419.3369                                                                                                | Saponins      | HQ    |

|            |       |                                                                  |                                                 |                                                                |              |                                                                                                                               |               |    |
|------------|-------|------------------------------------------------------------------|-------------------------------------------------|----------------------------------------------------------------|--------------|-------------------------------------------------------------------------------------------------------------------------------|---------------|----|
| <b>160</b> | 34.22 | Astragaloside IV*                                                | C <sub>41</sub> H <sub>68</sub> O <sub>14</sub> | 807.4498 [M+Na] <sup>+</sup><br>829.4604 [M+HCOO] <sup>-</sup> | -0.4<br>1.5  | 473.3618, 455.3530, 437.3375, 419.3280<br>783.4523, 651.4120, 621.4014, 489.3558                                              | Saponins      | HQ |
| <b>161</b> | 34.44 | Astragaloside III*                                               | C <sub>41</sub> H <sub>68</sub> O <sub>14</sub> | 807.4499 [M+Na] <sup>+</sup><br>829.4595 [M+HCOO] <sup>-</sup> | -0.3<br>0.4  | 455.3530, 437.3375, 419.3280<br>783.4549, 621.4014, 489.3583, 471.3496,<br>453.3344                                           | Saponins      | HQ |
| <b>162</b> | 35.34 | Senkyunolide E or isomer                                         | C <sub>12</sub> H <sub>12</sub> O <sub>3</sub>  | 203.0723 [M-H] <sup>-</sup>                                    | 4.5          | 173.0250, 145.0304                                                                                                            | Phthalides    | DG |
| <b>163</b> | 35.49 | Senkyunolide A*                                                  | C <sub>12</sub> H <sub>16</sub> O <sub>2</sub>  | 193.1218 [M+H] <sup>+</sup>                                    | -2.5         | 175.1139, 147.1157, 137.0613                                                                                                  | Phthalides    | DG |
| <b>164</b> | 36.13 | 3-(4'-O-Malonyl) Rha<br>(1-2) Gal (1-2) GluA-<br>Soyasaponenol B | C <sub>51</sub> H <sub>80</sub> O <sub>21</sub> | 1027.5107 [M-H] <sup>-</sup>                                   | -0.6         | 983.5245                                                                                                                      | Saponins      | HQ |
| <b>165</b> | 36.36 | Agroastragaloside III<br>or isomer                               | C <sub>51</sub> H <sub>82</sub> O <sub>21</sub> | 1075.5319 [M+HCOO] <sup>-</sup>                                | -1.1         | 987.5076, 969.5118, 945.5029, 927.4930,<br>765.4378, 747.4249, 489.3515                                                       | Saponins      | HQ |
| <b>166</b> | 36.49 | Astramembrannin II                                               | C <sub>35</sub> H <sub>58</sub> O <sub>9</sub>  | 645.3974 [M+Na] <sup>+</sup>                                   | 0.1          | 473.3618, 455.3530, 437.3375                                                                                                  | Saponins      | HQ |
| <b>167</b> | 36.71 | Isoastragaloside II                                              | C <sub>43</sub> H <sub>70</sub> O <sub>15</sub> | 871.4674 [M+HCOO] <sup>-</sup><br>849.4604 [M+Na] <sup>+</sup> | -0.3<br>-0.3 | 825.4676, 783.4584, 765.4448, 489.3554<br>455.3530, 437.3375, 419.3369<br>923.4985, 879.5089, 795.4513, 615.3879,<br>457.3662 | Saponins      | HQ |
| <b>168</b> | 36.95 | Soyasaponin I                                                    | C <sub>48</sub> H <sub>78</sub> O <sub>18</sub> | 941.5114 [M-H] <sup>-</sup><br>965.5074 [M+Na] <sup>+</sup>    | -0.1<br>-0.7 | 943.5273, 599.3948, 581.3837, 441.3735,<br>423.3631, 405.3525                                                                 | Saponins      | HQ |
| <b>169</b> | 37.66 | Agroastragaloside III<br>or isomer                               | C <sub>51</sub> H <sub>82</sub> O <sub>21</sub> | 1029.5293 [M-H] <sup>-</sup>                                   | 1.6          | 987.5073, 969.5065, 927.4981, 909.4836,<br>765.4513                                                                           | Saponins      | HQ |
| <b>170</b> | 38.00 | 9-Octadecenedioic acid                                           | C <sub>18</sub> H <sub>32</sub> O <sub>4</sub>  | 311.2237 [M-H] <sup>-</sup>                                    | 2.8          | 293.2122, 275.2028, 235.1705, 223.1702                                                                                        | Organic acids | HQ |
| <b>171</b> | 38.42 | Agroastragaloside I or<br>isomer                                 | C <sub>45</sub> H <sub>74</sub> O <sub>16</sub> | 915.4972 [M+HCOO] <sup>-</sup>                                 | 1.4          | 869.4837, 809.4691, 767.4486                                                                                                  | Saponins      | HQ |
| <b>172</b> | 38.56 | Cyclocephaloside II                                              | C <sub>43</sub> H <sub>70</sub> O <sub>15</sub> | 871.4706 [M+HCOO] <sup>-</sup><br>849.4603 [M+Na] <sup>+</sup> | 1<br>-0.4    | 825.4652, 765.4436<br>669.3967, 455.3525, 437.3416, 419.3318                                                                  | Saponins      | HQ |



|            |       |                                      |                                                 |                                                                |             |                                                                                                                                                |               |       |
|------------|-------|--------------------------------------|-------------------------------------------------|----------------------------------------------------------------|-------------|------------------------------------------------------------------------------------------------------------------------------------------------|---------------|-------|
| <b>173</b> | 38.78 | 1,18-Octadecenedioic acid            | C <sub>18</sub> H <sub>32</sub> O <sub>4</sub>  | 311.2236 [M-H] <sup>-</sup>                                    | 2.5         | 293.2112, 275.2017, 235.1694, 223.1700                                                                                                         | Organic acids | HQ    |
| <b>174</b> | 38.96 | Astroolesaponins A                   | C <sub>48</sub> H <sub>76</sub> O <sub>18</sub> | 939.4962 [M-H] <sup>-</sup>                                    | 0.3         | 921.4901, 877.4963, 631.3850, 613.3712, 455.3514                                                                                               | Saponins      | HQ    |
| <b>175</b> | 39.18 | Agroastragaloside I or isomer        | C <sub>45</sub> H <sub>74</sub> O <sub>16</sub> | 915.4977 [M+HCOO] <sup>-</sup>                                 | 2           | 869.4855, 827.4796, 809.4689, 767.4582                                                                                                         | Saponins      | HQ    |
| <b>176</b> | 39.21 | Trojanoside A                        | C <sub>43</sub> H <sub>70</sub> O <sub>15</sub> | 871.4704 [M+HCOO] <sup>-</sup><br>849.4604 [M+Na] <sup>+</sup> | 0.8<br>-0.3 | 825.4647, 765.4377<br>669.3947, 455.3530, 437.3375, 419.3280                                                                                   | Saponins      | HQ    |
| <b>177</b> | 39.54 | 9,10-dihydroxy-12Z-octadecenoic acid | C <sub>18</sub> H <sub>34</sub> O <sub>4</sub>  | 313.2395 [M-H] <sup>-</sup>                                    | 3.3         | 295.2273, 277.2173, 183.1395                                                                                                                   | Organic acids | HQ/DG |
| <b>178</b> | 39.80 | Butylphthalide                       | C <sub>12</sub> H <sub>14</sub> O <sub>2</sub>  | 191.1069 [M+H] <sup>+</sup>                                    | 1           | 173.0967, 163.1127, 145.1013, 117.0704                                                                                                         | Phthalides    | DG    |
| <b>179</b> | 39.99 | Astragaloside I*                     | C <sub>45</sub> H <sub>72</sub> O <sub>16</sub> | 913.4808 [M+HCOO] <sup>-</sup><br>891.4702 [M+Na] <sup>+</sup> | 0.6<br>-1.2 | 867.4719, 825.4635, 807.4495, 765.4388, 603.3872, 489.3526<br>689.4226, 671.4134, 653.4082, 455.3530, 437.3375, 419.3280                       | Saponins      | HQ    |
| <b>180</b> | 40.12 | Cycloastragenol*                     | C <sub>30</sub> H <sub>50</sub> O <sub>5</sub>  | 513.3544 [M+Na] <sup>+</sup>                                   | -1.3        | 455.3528, 437.3415, 419.3318                                                                                                                   | Triterpene    | HQ    |
| <b>181</b> | 40.15 | Huangqiyein A                        | C <sub>37</sub> H <sub>60</sub> O <sub>10</sub> | 687.4090 [M+Na] <sup>+</sup>                                   | 1.6         | 453.3378, 435.3256                                                                                                                             | Saponins      | HQ    |
| <b>182</b> | 40.53 | Isoastragaloside I*                  | C <sub>45</sub> H <sub>72</sub> O <sub>16</sub> | 913.4816 [M+HCOO] <sup>-</sup><br>891.4707 [M+Na] <sup>+</sup> | 1.5<br>-0.6 | 867.4763, 825.4608, 807.4488, 783.4554, 765.4444<br>711.4018, 455.3530, 437.3375, 419.3280<br>909.4856, 867.4741, 825.4683, 807.4549, 765.4427 | Saponins      | HQ    |
| <b>183</b> | 40.70 | Malonylastragaloside I               | C <sub>48</sub> H <sub>74</sub> O <sub>19</sub> | 953.4762 [M-H] <sup>-</sup><br>977.4712 [M+Na] <sup>+</sup>    | 1.1<br>-1   | 775.4269, 757.4158, 739.4058, 455.3530, 437.3419, 419.3319                                                                                     | Saponins      | HQ    |
| <b>184</b> | 41.09 | Senkyunolide K                       | C <sub>12</sub> H <sub>16</sub> O <sub>3</sub>  | 207.1027 [M-H] <sup>-</sup>                                    | -0.1        | 189.0901, 161.0967, 145.0297                                                                                                                   | Phthalides    | DG    |

|            |       |                                        |                                                 |                                                                |             |                                                                                                         |               |       |
|------------|-------|----------------------------------------|-------------------------------------------------|----------------------------------------------------------------|-------------|---------------------------------------------------------------------------------------------------------|---------------|-------|
| <b>185</b> | 41.15 | Butylphthalide                         | C <sub>12</sub> H <sub>14</sub> O <sub>2</sub>  | 191.1066 [M+H] <sup>+</sup>                                    | -0.1        | 173.0964, 145.1013                                                                                      | Phthalides    | DG    |
| <b>186</b> | 41.23 | Neoastragaloside I                     | C <sub>45</sub> H <sub>72</sub> O <sub>16</sub> | 913.4805 [M+HCOO] <sup>-</sup><br>891.4707 [M+Na] <sup>+</sup> | 0.3<br>-0.7 | 867.4730, 825.4682, 807.4511, 765.4423<br>689.4262, 671.4155, 653.4050, 455.3522,<br>437.3414, 419.3315 | Saponins      | HQ    |
| <b>187</b> | 41.42 | Z-ligustilide                          | C <sub>12</sub> H <sub>14</sub> O <sub>2</sub>  | 191.1064 [M+H] <sup>+</sup>                                    | -1.2        | 173.0984, 163.1123, 145.1005                                                                            | Phthalides    | DG    |
| <b>188</b> | 41.57 | Capsidiol or isomer                    | C <sub>15</sub> H <sub>24</sub> O <sub>2</sub>  | 235.1710 [M-H] <sup>-</sup>                                    | 2.8         | 217.1650                                                                                                | Others        | HQ    |
| <b>189</b> | 42.22 | Senkyunolide G                         | C <sub>12</sub> H <sub>16</sub> O <sub>3</sub>  | 207.1026 [M-H] <sup>-</sup>                                    | -0.1        | 189.0927, 163.1131, 135.0379                                                                            | Phthalides    | DG    |
| <b>190</b> | 42.37 | Acetylastragaloside I                  | C <sub>47</sub> H <sub>74</sub> O <sub>17</sub> | 955.4917 [M+HCOO] <sup>-</sup><br>933.4807 [M+Na] <sup>+</sup> | 1<br>-1.2   | 909.4814, 867.4686, 825.4712<br>873.4547, 753.4211, 695.4172, 455.3530,<br>437.3375, 419.3280           | Saponins      | HQ    |
| <b>191</b> | 42.67 | 13-Hydroxy-9,11-octadecadienoic acid   | C <sub>18</sub> H <sub>32</sub> O <sub>3</sub>  | 295.2290 [M-H] <sup>-</sup><br>319.2241 [M+Na] <sup>+</sup>    | 3.9<br>-0.9 | 277.2183, 195.1395, 171.1033<br>279.2334, 261.2215                                                      | Organic acids | HQ/DG |
| <b>192</b> | 42.79 | 10-Angeloylbutylphthalide              | C <sub>17</sub> H <sub>20</sub> O <sub>4</sub>  | 311.1250 [M+Na] <sup>+</sup>                                   | -1.1        | 189.0927, 161.0953                                                                                      | Phthalides    | DG    |
| <b>193</b> | 42.90 | 9-hydroxy-10E,12Z-octadecadienoic acid | C <sub>18</sub> H <sub>32</sub> O <sub>3</sub>  | 295.2287 [M-H] <sup>-</sup>                                    | 2.8         | 277.2168, 171.1020                                                                                      | Organic acids | DG    |
| <b>194</b> | 42.95 | Riligustilide                          | C <sub>24</sub> H <sub>28</sub> O <sub>4</sub>  | 403.1880 [M+Na] <sup>+</sup>                                   | 0           | 381.2086, 191.1085, 173.0984                                                                            | Phthalides    | DG    |
| <b>195</b> | 43.09 | (9E)-12-hydroxyoctadec-9-enoic acid    | C <sub>18</sub> H <sub>34</sub> O <sub>3</sub>  | 297.2441 [M-H] <sup>-</sup>                                    | 1.9         | 279.2344, 169.1235                                                                                      | Organic acids | HQ/DG |
| <b>196</b> | 43.13 | E, E'-3, 3', 8, 8'-isodiligustilide    | C <sub>24</sub> H <sub>26</sub> O <sub>4</sub>  | 401.1722 [M+Na] <sup>+</sup>                                   | -0.2        | 213.0883, 191.1085, 173.0984                                                                            | Phthalides    | DG    |
| <b>197</b> | 43.24 | Capsidiol or isomer                    | C <sub>15</sub> H <sub>24</sub> O <sub>2</sub>  | 235.1708 [M-H] <sup>-</sup>                                    | 1.9         | 205.1609                                                                                                | Others        | HQ    |

|            |       |                   |                                                |                                                            |      |                              |  |               |       |
|------------|-------|-------------------|------------------------------------------------|------------------------------------------------------------|------|------------------------------|--|---------------|-------|
| <b>198</b> | 43.68 | Huangqiyeinins II | C <sub>30</sub> H <sub>50</sub> O <sub>5</sub> | 489.3582 [M-H] <sup>-</sup>                                | -0.8 | 471.3503                     |  | Triterpene    | HQ    |
| <b>199</b> | 43.80 | Tokinolide C      | C <sub>24</sub> H <sub>28</sub> O <sub>4</sub> | 403.1879 [M+Na] <sup>+</sup>                               | -0.1 | 213.0883, 191.1085           |  | Phthalides    | DG    |
| <b>200</b> | 44.01 | Tokinolide B      | C <sub>24</sub> H <sub>28</sub> O <sub>4</sub> | 403.1882 [M+Na] <sup>+</sup>                               | 0.5  | 213.0884                     |  | Phthalides    | DG    |
| <b>201</b> | 44.15 | Levistolide A*    | C <sub>24</sub> H <sub>28</sub> O <sub>4</sub> | 403.1886 [M+Na] <sup>+</sup>                               | 1.4  | 213.0883, 191.1085, 173.0984 |  | Phthalides    | DG    |
| <b>202</b> | 45.06 | Angelicide        | C <sub>24</sub> H <sub>28</sub> O <sub>4</sub> | 403.1883 [M+Na] <sup>+</sup>                               | 0.9  | 191.1068, 173.0957           |  | Phthalides    | DG    |
| <b>203</b> | 45.31 | Isotokinolide B   | C <sub>24</sub> H <sub>28</sub> O <sub>4</sub> | 403.1883 [M+Na] <sup>+</sup>                               | 0.7  | 191.1064, 173.0967, 145.1014 |  | Phthalides    | DG    |
| <b>204</b> | 45.42 | Ursolic acid*     | C <sub>30</sub> H <sub>48</sub> O <sub>3</sub> | 455.3536 [M-H] <sup>-</sup><br>457.3664 [M+H] <sup>+</sup> | -2.6 | 409.3478<br>–                |  | Triterpene    | HQ    |
| <b>205</b> | 45.46 | Linolenic acid    | C <sub>18</sub> H <sub>30</sub> O <sub>2</sub> | 277.2178 [M-H] <sup>-</sup>                                | 1.7  | –                            |  | Organic acids | HQ    |
| <b>206</b> | 46.35 | Linoleic acid     | C <sub>18</sub> H <sub>32</sub> O <sub>2</sub> | 279.2339 [M-H] <sup>-</sup>                                | 3.5  | –                            |  | Organic acids | HQ/DG |
| <b>207</b> | 47.07 | Palmitic acid*    | C <sub>16</sub> H <sub>32</sub> O <sub>2</sub> | 255.2337 [M-H] <sup>-</sup>                                | 3    | 237.2177                     |  | Organic acids | HQ    |

Note: RT: retention time; \*: compound with a reference standard; –: not found; HQ: *Astragalus membranaceus* (Fisch.) Bge. var. *mongholicus* (Bge.) Hsiao; DG:

*Angelica sinensis* (Oliv.) Diels.

**Table S2.** Prototype components of DBD in rat serum by UPLC-Q-TOF-MS.

| No. | RT (min) | Identification                                             | Formula                                                        | MS                                                             | Error (ppm) | MS/MS                          | Classification | Origin |
|-----|----------|------------------------------------------------------------|----------------------------------------------------------------|----------------------------------------------------------------|-------------|--------------------------------|----------------|--------|
| 1   | 0.65     | Cytidine monophosphate                                     | C <sub>9</sub> H <sub>14</sub> N <sub>3</sub> O <sub>8</sub> P | 368.0511 [M+HCOO] <sup>-</sup>                                 | 3           | 78.9585                        | Others         | HQ     |
| 2   | 2.43     | Piscidic acid                                              | C <sub>11</sub> H <sub>12</sub> O <sub>7</sub>                 | 255.0491 [M-H] <sup>-</sup>                                    | –           | 193.0495                       | Organic acids  | HQ     |
| 3   | 3.34     | Indole-3-carboxaldehyde                                    | C <sub>9</sub> H <sub>7</sub> NO                               | 146.0602 [M+H] <sup>+</sup>                                    | 1           | 118.0676, 91.0539              | Others         | HQ/DG  |
| 4   | 4.81     | Phthalic anhydride                                         | C <sub>8</sub> H <sub>4</sub> O <sub>3</sub>                   | 149.0233 [M+H] <sup>+</sup>                                    | -0.2        | 121.0309                       | Others         | DG     |
| 5   | 6.0      | Icariside F2                                               | C <sub>18</sub> H <sub>26</sub> O <sub>10</sub>                | 425.1425 [M+Na] <sup>+</sup>                                   | 1.6         | –                              | Others         | DG     |
| 6   | 7.11     | Riboflavin*                                                | C <sub>17</sub> H <sub>20</sub> N <sub>4</sub> O <sub>6</sub>  | 377.1455 [M+H] <sup>+</sup>                                    | -0.2        | 243.0882                       | Others         | HQ     |
| 7   | 9.22     | 6-Methoxycoumarin                                          | C <sub>10</sub> H <sub>8</sub> O <sub>3</sub>                  | 177.0544 [M+H] <sup>+</sup>                                    | -1          | 149.0594, 134.0381             | Others         | DG     |
| 8   | 10.36    | Calycosin-7-O-β-D-glucoside*                               | C <sub>22</sub> H <sub>22</sub> O <sub>10</sub>                | 469.1107 [M+Na] <sup>+</sup><br>491.1184 [M+HCOO] <sup>-</sup> | -2.2        | 285.0760<br>283.0629, 268.0343 | Flavonoids     | HQ     |
| 9   | 11.42    | 3'-methoxy-5'-hydroxy-isoflavanone-7-O-β-D-glucopyranoside | C <sub>22</sub> H <sub>22</sub> O <sub>10</sub>                | 491.1205 [M+HCOO] <sup>-</sup>                                 | 2           | 267.0345                       | Flavonoids     | HQ     |
| 10  | 14.23    | 3'-hydroxy-5'-methoxy-isoflavanone-7-O-β-D-glucopyranoside | C <sub>22</sub> H <sub>22</sub> O <sub>10</sub>                | 469.1113 [M+Na] <sup>+</sup>                                   | -1.6        | 285.0760, 270.0484             | Flavonoids     | HQ     |
| 11  | 14.65    | Calycosin-7-O-β-D-glucoside-6"-O-malonate or isomer        | C <sub>25</sub> H <sub>24</sub> O <sub>13</sub>                | 533.1299 [M+H] <sup>+</sup>                                    | -1.2        | 285.0760                       | Flavonoids     | HQ     |

|           |       |                                               |                                                 |                                                             |      |                                                    |               |    |
|-----------|-------|-----------------------------------------------|-------------------------------------------------|-------------------------------------------------------------|------|----------------------------------------------------|---------------|----|
| <b>12</b> | 17.68 | Ononin*                                       | C <sub>22</sub> H <sub>22</sub> O <sub>9</sub>  | 453.1153 [M+Na] <sup>+</sup>                                | -0.6 | 269.0810, 254.0554                                 | Flavonoids    | HQ |
| <b>13</b> | 18.69 | Liquiritigenin*                               | C <sub>15</sub> H <sub>12</sub> O <sub>4</sub>  | 255.0665 [M-H] <sup>-</sup>                                 | 0.7  | 135.0074, 119.0485                                 | Flavonoids    | HQ |
| <b>14</b> | 19.35 | Daidzein*                                     | C <sub>15</sub> H <sub>10</sub> O <sub>4</sub>  | 255.0644 [M+H] <sup>+</sup><br>253.0510 [M-H] <sup>-</sup>  | 1.6  | 255.0650, 137.0256<br>135.0023                     | Flavonoids    | HQ |
| <b>15</b> | 20.49 | Methylinissolin-3-O-β-D-glucoside             | C <sub>23</sub> H <sub>26</sub> O <sub>10</sub> | 485.1420 [M+Na] <sup>+</sup>                                | 0.5  | 301.1085, 167.0712                                 | Flavonoids    | HQ |
| <b>16</b> | 20.63 | Prunin                                        | C <sub>21</sub> H <sub>22</sub> O <sub>10</sub> | 457.1103 [M+Na] <sup>+</sup><br>433.1136 [M-H] <sup>-</sup> | -0.9 | 435.1225<br>271.0606                               | Flavonoids    | HQ |
| <b>17</b> | 20.94 | Glycitein*                                    | C <sub>16</sub> H <sub>12</sub> O <sub>5</sub>  | 283.0607 [M-H] <sup>-</sup>                                 | -1.6 | 268.0343, 211.0410                                 | Flavonoids    | HQ |
| <b>18</b> | 21.74 | Calycosin*                                    | C <sub>16</sub> H <sub>12</sub> O <sub>5</sub>  | 285.0754 [M+H] <sup>+</sup>                                 | -1.2 | 270.0555, 225.0633, 137.0256                       | Flavonoids    | HQ |
| <b>19</b> | 25.56 | Genistein*                                    | C <sub>15</sub> H <sub>10</sub> O <sub>5</sub>  | 271.0598 [M+H] <sup>+</sup>                                 | -1.3 | 153.0172                                           | Flavonoids    | HQ |
| <b>20</b> | 28.67 | 9,12,13-Trihydroxyoctadeca-10,15-dienoic acid | C <sub>18</sub> H <sub>32</sub> O <sub>5</sub>  | 327.2185 [M-H] <sup>-</sup>                                 | 2.4  | 291.2001, 239.1644                                 | Organic acids | DG |
| <b>21</b> | 28.92 | 9,10,11-Trihydroxyoctadeca-12,15-dienoic acid | C <sub>18</sub> H <sub>32</sub> O <sub>5</sub>  | 351.2138 [M+Na] <sup>+</sup>                                | -1.2 | 293.2093, 275.2016                                 | Organic acids | DG |
| <b>22</b> | 30.69 | Formononetin*                                 | C <sub>16</sub> H <sub>12</sub> O <sub>4</sub>  | 269.0804 [M+H] <sup>+</sup><br>267.0671 [M-H] <sup>-</sup>  | 3.2  | 254.0554, 237.0498, 226.0596<br>252.0414, 223.0348 | Flavonoids    | HQ |
| <b>23</b> | 31.22 | Methylnissolin                                | C <sub>17</sub> H <sub>16</sub> O <sub>5</sub>  | 301.1062 [M+H] <sup>+</sup>                                 | -2.7 | 269.0810, 167.0712                                 | Flavonoids    | HQ |
| <b>24</b> | 34.22 | Astragaloside IV*                             | C <sub>41</sub> H <sub>68</sub> O <sub>14</sub> | 829.4582 [M+HCOO] <sup>-</sup>                              | -1.1 | 489.3558                                           | Saponins      | HQ |
| <b>25</b> | 36.49 | Astramembrannin II                            | C <sub>35</sub> H <sub>58</sub> O <sub>9</sub>  | 645.3969 [M+Na] <sup>+</sup>                                | -0.7 | 473.3618, 455.3530, 437.3375                       | Saponins      | HQ |

|           |       |                     |                                                 |                                |      |                              |            |    |
|-----------|-------|---------------------|-------------------------------------------------|--------------------------------|------|------------------------------|------------|----|
| <b>26</b> | 36.65 | Isoastragaloside II | C <sub>43</sub> H <sub>70</sub> O <sub>15</sub> | 871.4706 [M+HCOO] <sup>-</sup> | 1.1  | 489.3448                     | Saponins   | HQ |
| <b>27</b> | 41.06 | Butylphthalide      | C <sub>12</sub> H <sub>14</sub> O <sub>2</sub>  | 191.1060 [M+H] <sup>+</sup>    | -3.3 | 173.0927, 163.1123, 145.1005 | Phthalides | DG |
| <b>28</b> | 44.11 | Levistolide A*      | C <sub>24</sub> H <sub>28</sub> O <sub>4</sub>  | 403.1879 [M+Na] <sup>+</sup>   | -0.2 | 191.1025                     | Phthalides | DG |
| <b>29</b> | 45.42 | Ursolic acid*       | C <sub>30</sub> H <sub>48</sub> O <sub>3</sub>  | 455.3521 [M-H] <sup>-</sup>    | -2.1 | –                            | Triterpene | HQ |

Note: RT: retention time; \*: compound with a reference standard; –: not found; HQ: *Astragalus membranaceus* (Fisch.) Bge. var. *mongholicus* (Bge.) Hsiao; DG: *Angelica sinensis* (Oliv.) Diels.

**Table S3.** Identification of the exogenous metabolites of DBD by UPLC-Q-TOF-MS.

| No. | RT (min) | Identification                                                                     | Formula                                           | MS                             | Error (ppm) | MS/MS                                            | Classification | Origin |
|-----|----------|------------------------------------------------------------------------------------|---------------------------------------------------|--------------------------------|-------------|--------------------------------------------------|----------------|--------|
| M1  | 3.32     | Glycitein-H <sub>2</sub> +O <sub>2</sub> +CH <sub>2</sub>                          | C <sub>17</sub> H <sub>12</sub> O <sub>7</sub>    | 363.0268 [M+Cl] <sup>-</sup>   | -2.7        | 225.0606, 165.0148, 117.0327                     | Flavonoids     | HQ     |
| M2  | 3.33     | Prunin-O+H <sub>2</sub>                                                            | C <sub>21</sub> H <sub>24</sub> O <sub>9</sub>    | 455.1134 [M+Cl] <sup>-</sup>   | 4.2         | 151.0010                                         | Flavonoids     | HQ     |
| M3  | 6.06     | Piscidic acid+CH <sub>2</sub> +H <sub>2</sub> O                                    | C <sub>7</sub> H <sub>14</sub> O <sub>9</sub>     | 287.0632 [M+HCOO] <sup>-</sup> | 3.7         | 193.0495                                         | Organic acids  | HQ     |
| M4  | 9.64     | Astragaloside IV-<br>C <sub>5</sub> H <sub>8</sub> O <sub>5</sub> +SO <sub>3</sub> | C <sub>36</sub> H <sub>60</sub> O <sub>12</sub> S | 755.3423 [M+K] <sup>+</sup>    | -1.9        | –                                                | Saponins       | HQ     |
| M5  | 10.72    | Glycitein+O-H <sub>2</sub> -H <sub>2</sub>                                         | C <sub>16</sub> H <sub>8</sub> O <sub>6</sub>     | 331.0027 [M+Cl] <sup>-</sup>   | 3.6         | 268.0414                                         | Flavonoids     | HQ     |
| M6  | 11.58    | Calycosin-7-O-β-D-<br>glucoside-CH <sub>2</sub>                                    | C <sub>21</sub> H <sub>20</sub> O <sub>10</sub>   | 431.0981 [M-H] <sup>-</sup>    | -0.6        | 239.0312, 211.0410                               | Flavonoids     | HQ     |
| M7  | 11.58    | Genistein+C <sub>6</sub> H <sub>10</sub> O <sub>5</sub>                            | C <sub>21</sub> H <sub>20</sub> O <sub>10</sub>   | 431.0981 [M-H] <sup>-</sup>    | -0.5        | 269.0430, 241.0536, 151.0025                     | Flavonoids     | HQ     |
| M8  | 11.58    | Ononin-CH <sub>2</sub> +O                                                          | C <sub>21</sub> H <sub>20</sub> O <sub>10</sub>   | 431.0981 [M-H] <sup>-</sup>    | -0.6        | 429.1183, 252.0414, 195.0442, 267.0631,          | Flavonoids     | HQ     |
| M9  | 12.53    | Calycosin-CH <sub>2</sub> +C <sub>6</sub> H <sub>8</sub> O <sub>6</sub>            | C <sub>21</sub> H <sub>18</sub> O <sub>11</sub>   | 445.0770 [M-H] <sup>-</sup>    | -1.4        | 283.0629                                         | Flavonoids     | HQ     |
| M10 | 12.53    | Daidzein+O                                                                         | C <sub>15</sub> H <sub>10</sub> O <sub>5</sub>    | 269.0452 [M-H] <sup>-</sup>    | -1.2        | 253.0531, 225.0540                               | Flavonoids     | HQ     |
| M11 | 12.53    | Formononetin+H <sub>2</sub> +C <sub>6</sub> H <sub>8</sub> O <sub>6</sub>          | C <sub>21</sub> H <sub>18</sub> O <sub>11</sub>   | 445.0770 [M-H] <sup>-</sup>    | -1.4        | 267.0702                                         | Flavonoids     | HQ     |
| M12 | 13.99    | Butylphthalide+H <sub>2</sub> O+O                                                  | C <sub>12</sub> H <sub>16</sub> O <sub>4</sub>    | 247.0934 [M+Na] <sup>+</sup>   | -2.7        | 191.1025, 163.1179, 135.0455, 173.0927, 117.0691 | Phthalides     | DG     |

|     |       |                                                                                 |                                                  |                                |      |                                           |                       |            |    |
|-----|-------|---------------------------------------------------------------------------------|--------------------------------------------------|--------------------------------|------|-------------------------------------------|-----------------------|------------|----|
| M13 | 13.99 | Butylphthalide+O                                                                | C <sub>12</sub> H <sub>14</sub> O <sub>3</sub>   | 207.1010 [M+H] <sup>+</sup>    | -2.8 | 191.1025,<br>163.1179, 135.0455,          | 173.0927,<br>117.0691 | Phthalides | DG |
| M14 | 14.97 | Calycosin+C <sub>6</sub> H <sub>8</sub> O <sub>6</sub>                          | C <sub>22</sub> H <sub>20</sub> O <sub>11</sub>  | 459.0943 [M-H] <sup>-</sup>    | 2.2  | 268.0343,<br>211.0410, 135.0074           | 239.0312,             | Flavonoids | HQ |
| M15 | 14.97 | Formononetin-<br>CH <sub>2</sub> +C <sub>6</sub> H <sub>10</sub> O <sub>5</sub> | C <sub>21</sub> H <sub>18</sub> O <sub>9</sub>   | 459.0943 [M+HCOO] <sup>-</sup> | 2.3  | 135.0074                                  |                       | Flavonoids | HQ |
| M16 | 14.97 | Formononetin+O                                                                  | C <sub>16</sub> H <sub>12</sub> O <sub>5</sub>   | 283.0619 [M-H] <sup>-</sup>    | 2.6  | 135.0074                                  |                       | Flavonoids | HQ |
| M17 | 15.41 | Calycosin+SO <sub>3</sub>                                                       | C <sub>16</sub> H <sub>12</sub> O <sub>8</sub> S | 363.0185 [M-H] <sup>-</sup>    | 1.4  | 283.0556,<br>211.0410, 135.0074           | 239.0312,             | Flavonoids | HQ |
| M18 | 16.27 | Glycitein+H <sub>2</sub> +C <sub>6</sub> H <sub>10</sub> O <sub>5</sub>         | C <sub>22</sub> H <sub>24</sub> O <sub>10</sub>  | 447.1297 [M-H] <sup>-</sup>    | 0.1  | 283.0629, 268.0414,<br>239.0379, 165.0260 | 255.0653,             | Flavonoids | HQ |
| M19 | 18.28 | Calycosin-7-O-β-D-<br>glucoside-H <sub>2</sub>                                  | C <sub>22</sub> H <sub>20</sub> O <sub>10</sub>  | 443.0983 [M-H] <sup>-</sup>    | -0.1 | 239.0312, 135.0074                        |                       | Flavonoids | HQ |
| M20 | 18.28 | Glycitein-H <sub>2</sub> +C <sub>6</sub> H <sub>10</sub> O <sub>5</sub>         | C <sub>22</sub> H <sub>20</sub> O <sub>10</sub>  | 443.0983 [M-H] <sup>-</sup>    | -0.1 | 255.0653, 239.0312                        |                       | Flavonoids | HQ |
| M21 | 18.28 | Ononin+O-H <sub>2</sub>                                                         | C <sub>22</sub> H <sub>20</sub> O <sub>10</sub>  | 443.0983 [M-H] <sup>-</sup>    | -0.1 | 267.0631, 135.0074                        |                       | Flavonoids | HQ |
| M22 | 18.69 | Daidzein+H <sub>2</sub>                                                         | C <sub>15</sub> H <sub>12</sub> O <sub>4</sub>   | 255.0665 [M-H] <sup>-</sup>    | 0.5  | 135.0074                                  |                       | Flavonoids | HQ |
| M23 | 18.69 | Genistein-O+H <sub>2</sub>                                                      | C <sub>15</sub> H <sub>12</sub> O <sub>4</sub>   | 255.0665 [M-H] <sup>-</sup>    | 0.5  | 241.0536, 151.0025                        |                       | Flavonoids | HQ |
| M24 | 20.63 | Daidzein+H <sub>2</sub> O+C <sub>6</sub> H <sub>10</sub> O <sub>5</sub>         | C <sub>21</sub> H <sub>22</sub> O <sub>10</sub>  | 433.1136 [M-H] <sup>-</sup>    | -1   | 135.0074                                  |                       | Flavonoids | HQ |
| M25 | 20.94 | Genistein+CH <sub>2</sub>                                                       | C <sub>16</sub> H <sub>12</sub> O <sub>5</sub>   | 283.0607 [M-H] <sup>-</sup>    | -1.8 | 269.0430, 241.0468,<br>151.0025           |                       | Flavonoids | HQ |
| M26 | 21.62 | Formononetin+C <sub>6</sub> H <sub>10</sub> O <sub>5</sub>                      | C <sub>22</sub> H <sub>22</sub> O <sub>9</sub>   | 475.1248 [M+HCOO] <sup>-</sup> | 0.4  | 252.0414, 195.0442                        |                       | Flavonoids | HQ |



|     |       |                                                                       |                                                   |                                |      |                                                  |            |    |
|-----|-------|-----------------------------------------------------------------------|---------------------------------------------------|--------------------------------|------|--------------------------------------------------|------------|----|
| M27 | 22.00 | Methylnissolin+C <sub>6</sub> H <sub>10</sub> O <sub>5</sub>          | C <sub>23</sub> H <sub>26</sub> O <sub>10</sub>   | 507.1510 [M+HCOO] <sup>-</sup> | 0.2  | 269.043                                          | Flavonoids | HQ |
| M28 | 23.20 | Calycosin-7-O-β-D-glucoside+H <sub>2</sub> O+CH <sub>2</sub>          | C <sub>23</sub> H <sub>26</sub> O <sub>11</sub>   | 477.1399 [M-H] <sup>-</sup>    | -0.9 | 283.0556, 211.0410                               | Flavonoids | HQ |
| M29 | 24.64 | Daidzein+CH <sub>2</sub>                                              | C <sub>16</sub> H <sub>12</sub> O <sub>4</sub>    | 267.0662 [M-H] <sup>-</sup>    | -0.6 | 225.0540                                         | Flavonoids | HQ |
| M30 | 24.64 | Formononetin+SO <sub>3</sub>                                          | C <sub>16</sub> H <sub>12</sub> O <sub>7</sub> S  | 347.0227 [M-H] <sup>-</sup>    | -1.1 | 252.0414, 223.0413, 195.0442                     | Flavonoids | HQ |
| M31 | 24.64 | Ononin-C <sub>6</sub> H <sub>10</sub> O <sub>5</sub> +SO <sub>3</sub> | C <sub>16</sub> H <sub>12</sub> O <sub>7</sub> S  | 347.0227 [M-H] <sup>-</sup>    | -1.1 | 252.0414, 223.0413, 195.0442                     | Flavonoids | HQ |
| M32 | 25.70 | Butylphthalide+C <sub>6</sub> H <sub>8</sub> O <sub>6</sub>           | C <sub>18</sub> H <sub>22</sub> O <sub>8</sub>    | 405.0943 [M+K] <sup>+</sup>    | -0.9 | 173.0927, 163.1179, 145.1005                     | Phthalides | HQ |
| M33 | 25.89 | Prunin-C <sub>6</sub> H <sub>10</sub> O <sub>5</sub> -H <sub>2</sub>  | C <sub>15</sub> H <sub>10</sub> O <sub>5</sub>    | 269.0455 [M-H] <sup>-</sup>    | 0    | 215.0683                                         | Flavonoids | HQ |
| M34 | 28.10 | Butylphthalide-H <sub>2</sub>                                         | C <sub>12</sub> H <sub>12</sub> O <sub>2</sub>    | 189.0906 [M+H] <sup>+</sup>    | -1.8 | 191.1025, 173.0927, 145.1005, 135.0404, 117.0691 | Phthalides | DG |
| M35 | 29.57 | Liquiritigenin+H <sub>2</sub>                                         | C <sub>15</sub> H <sub>14</sub> O <sub>4</sub>    | 257.0819 [M-H] <sup>-</sup>    | -0.4 | 135.0074                                         | Flavonoids | HQ |
| M36 | 30.20 | Butylphthalide+C <sub>5</sub> H <sub>7</sub> NO <sub>3</sub> S        | C <sub>17</sub> H <sub>21</sub> NO <sub>5</sub> S | 374.1030 [M+Na] <sup>+</sup>   | -0.8 | 191.1025, 173.0984, 163.1123, 145.1005, 117.0691 | Phthalides | DG |
| M37 | 30.69 | Glycitein-H <sub>2</sub> O+H <sub>2</sub>                             | C <sub>16</sub> H <sub>12</sub> O <sub>4</sub>    | 267.0671 [M-H] <sup>-</sup>    | 3.1  | 267.0631, 239.0379, 211.0410                     | Flavonoids | HQ |
| M38 | 33.94 | Butylphthalide+H <sub>2</sub> O+H <sub>2</sub>                        | C <sub>12</sub> H <sub>18</sub> O <sub>3</sub>    | 233.1160 [M+Na] <sup>+</sup>   | 4.8  | 191.1025, 173.0984, 163.1179, 145.1005, 117.0691 | Phthalides | DG |
| M39 | 40.99 | Calycosin-H <sub>2</sub> O+SO <sub>3</sub> +CH <sub>2</sub>           | C <sub>17</sub> H <sub>12</sub> O <sub>7</sub> S  | 395.0012 [M+Cl] <sup>-</sup>   | 3.7  | 283.0629, 268.0343, 135.0074                     | Flavonoids | HQ |
| M40 | 41.06 | Levistolide A+H <sub>2</sub> O                                        | C <sub>24</sub> H <sub>30</sub> O <sub>5</sub>    | 421.1983 [M+Na] <sup>+</sup>   | -0.7 | 381.2086, 213.0819, 191.1085, 173.0984, 145.1005 | Phthalides | DG |

|     |       |                                                                                                                 |                                                                 |                              |      |                                                     |            |    |
|-----|-------|-----------------------------------------------------------------------------------------------------------------|-----------------------------------------------------------------|------------------------------|------|-----------------------------------------------------|------------|----|
| M41 | 41.16 | Levistolide A+O                                                                                                 | C <sub>24</sub> H <sub>28</sub> O <sub>5</sub>                  | 397.2007 [M+H] <sup>+</sup>  | -0.5 | 381.3086, 213.0883                                  | Phthalides | DG |
| M42 | 41.73 | Levistolide<br>A+H <sub>2</sub> +C <sub>10</sub> H <sub>15</sub> N <sub>3</sub> O <sub>5</sub> S                | C <sub>34</sub> H <sub>45</sub> N <sub>3</sub> O <sub>9</sub> S | 672.2959 [M+H] <sup>+</sup>  | 1.5  | 381.2086, 213.0883, 191.1085,<br>173.0984, 145.1005 | Phthalides | DG |
| M43 | 43.08 | Methylnissoлин-<br>H <sub>2</sub> +O <sub>2</sub> +SO <sub>3</sub>                                              | C <sub>17</sub> H <sub>14</sub> O <sub>10</sub> S               | 445.0012 [M+Cl] <sup>-</sup> | 2.1  | –                                                   | Flavonoids | HQ |
| M44 | 45.02 | Astragaloside IV-<br>C <sub>6</sub> H <sub>10</sub> O <sub>5</sub> (cleavage)                                   | C <sub>35</sub> H <sub>58</sub> O <sub>9</sub>                  | 645.3973 [M+Na] <sup>+</sup> | 0    | 491.3715, 473.3428, 455.3530                        | Saponins   | HQ |
| M45 | 46.34 | Isoastragaloside II-<br>C <sub>7</sub> H <sub>10</sub> O <sub>6</sub> (cleavage)-O <sub>2</sub> +H <sub>2</sub> | C <sub>36</sub> H <sub>62</sub> O <sub>7</sub>                  | 641.4182 [M+Cl] <sup>-</sup> | -1.1 | 491.3715, 473.3428                                  | Saponins   | HQ |
| M46 | 46.43 | Astragaloside IV-<br>C <sub>6</sub> H <sub>10</sub> O <sub>6</sub> (cleavage)                                   | C <sub>35</sub> H <sub>58</sub> O <sub>8</sub>                  | 629.4029 [M+Na] <sup>+</sup> | 0.8  | 623.4166, 473.3428                                  | Saponins   | HQ |
| M47 | 46.57 | Astragaloside IV-<br>C <sub>5</sub> H <sub>8</sub> O <sub>5</sub> (cleavage)-O <sub>2</sub> +H <sub>2</sub>     | C <sub>36</sub> H <sub>62</sub> O <sub>7</sub>                  | 607.4561 [M+H] <sup>+</sup>  | -1.1 | 437.3466                                            | Saponins   | HQ |
| M48 | 47.03 | Daidzein+SO <sub>3</sub> +CH <sub>2</sub>                                                                       | C <sub>16</sub> H <sub>12</sub> O <sub>7</sub> S                | 383.0002 [M+Cl] <sup>-</sup> | 0.9  | 135.0074                                            | Flavonoids | HQ |
| M49 | 47.41 | Calycosin-<br>H <sub>2</sub> +SO <sub>3</sub> +C <sub>6</sub> H <sub>8</sub> O <sub>6</sub>                     | C <sub>22</sub> H <sub>18</sub> O <sub>14</sub> S               | 573.0093 [M+Cl] <sup>-</sup> | -3   | 239.0312, 135.0074                                  | Flavonoids | HQ |
| M50 | 47.64 | Astragaloside IV+O                                                                                              | C <sub>41</sub> H <sub>68</sub> O <sub>15</sub>                 | 801.4612 [M+H] <sup>+</sup>  | -2.4 | 491.3715                                            | Saponins   | HQ |
| M51 | 47.75 | Astragaloside IV+H <sub>2</sub> +CH <sub>2</sub>                                                                | C <sub>42</sub> H <sub>72</sub> O <sub>14</sub>                 | 823.4821 [M+Na] <sup>+</sup> | 0.7  | 623.4166, 491.3715, 473.3523,<br>455.3530           | Saponins   | HQ |

Note: RT: retention time; \*: compound with a reference standard; –: not found; HQ: *Astragalus membranaceus* (Fisch.) Bge. var. *mongholicus* (Bge.) Hsiao; DG:

*Angelica sinensis* (Oliv.) Diels
